# Supplementary material for: Iron-catalyzed addition/cyclization cascade of activated alkenes with alcohols: access to carbonyl substituted quinoline-2,4-diones
Source: Royal Society of Chemistry journal article supplement (doi:10.1039/c6ra08976c), 2016-01-01

## Supporting Information

### Iron-catalyzed addition/cyclization cascade of activated alkenes with alcohols: access to carbonyl substituted quinoline-2,4-diones

Shi-Sheng Wang,<sup>a</sup> Hong Fu,<sup>a</sup> Guanlin Wang,<sup>a</sup> Meng Sun,<sup>b</sup> and Ya-Min Li<sup>\*a</sup>

<sup>a</sup> Faculty of Life Science and Technology, Kunming University of Science and Technology, Kunming 650500, P. R. China. E-mail: liym@kmust.edu.cn.

<sup>b</sup> Key Laboratory of Synthetic and Natural Functional Molecule Chemistry of Ministry of Education, Department of Chemistry & Materials Science, Northwest University, Xi'an 710127, P. R. China.

|                                                       |    |
|-------------------------------------------------------|----|
| 1. General information                                | S2 |
| 2. Typical procedures for the synthesis of substrates | S2 |
| 3. General procedure for addition/cyclization cascade | S2 |
| 4. Characterization of products                       | S3 |
| 5. Charts of products                                 | S9 |

## 1. General information

NMR spectra were recorded on Bruker AVANCE DRX 500 (500 MHz for  $^1\text{H}$ ; 126 MHz for  $^{13}\text{C}$ ) and Bruker DRX 600 (600 MHz for  $^1\text{H}$ ; 151 MHz for  $^{13}\text{C}$ ) instruments internally referenced to TMS signal. Data are reported as follows: Chemical shift, multiplicity (s = singlet, d = doublet, t = triplet, q = quartet, m = multiplet), Coupling constants,  $J$ , are reported in hertz. Mass spectra were measured using Agilent 6530 Accurate-Mass Q-TOF LC/MS. IR spectra were recorded on a Bruker Tensor 27 FT-IR spectrometer and only major peaks are reported in  $\text{cm}^{-1}$ . The starting materials were purchased from Aldrich, Acros Organics, TCI or J&K Chemicals and used without further purification. Solvents were dried and purified according to the procedure from "Purification of Laboratory Chemicals book". Column chromatography was carried out on silica gel (particle size 200-400 mesh ASTM).

## 2. Typical procedures for the synthesis of substrates

The preparation of amide **1** were described in previous reports.<sup>S1</sup>

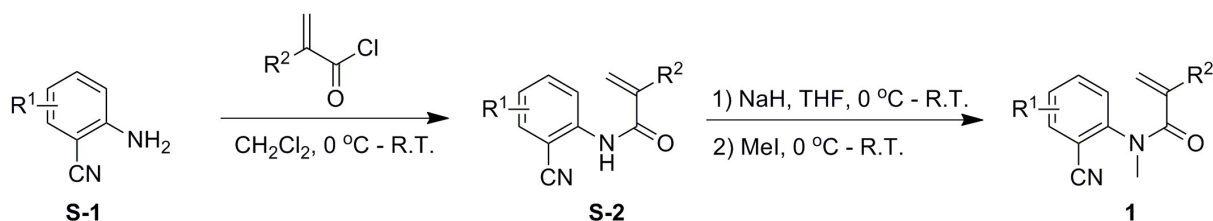

To the solution of anthranilonitrile **S-1** (2.0 mmol) and  $\text{Et}_3\text{N}$  (2.4 mmol) in 20 mL dry  $\text{CH}_2\text{Cl}_2$  was added acryloyl chloride (2.2 mmol) at 0 °C. The mixture was allowed to stir at room temperature. After completion of the reaction, the reaction was quenched with saturated  $\text{NaHCO}_3$  solution, then extracted with  $\text{CH}_2\text{Cl}_2$ , washed with brine, dried over  $\text{MgSO}_4$  and concentrated by evaporator affording amide **S-2** without any further purification.

To the solution of amide **S-2** (2.0 mmol) in 20 mL dry THF was added NaH (3.0 mmol) at 0 °C under argon. The mixture was allowed to stir at room temperature for 1h, then MeI (3.0 mmol) was added to the reaction mixture dropwise at 0 °C. The reaction mixture was warmed to room temperature. After completion of the reaction, the reaction was cooled to 0 °C and quenched with  $\text{H}_2\text{O}$  and extracted with ether. The extract was washed with brine and dried over  $\text{MgSO}_4$ . Concentration under reduced pressure and purification by silica gel flash chromatography to afford amide **1**.

## 3. General procedure for addition/cyclization cascade

A mixture of *o*-cyanoarylacrylamide **1** (0.3 mmol), alcohol **2** (1.5 mmol),  $\text{FeCl}_2$  (0.015 mmol), and TBHP (0.9 mmol) in EtOAc (1.5 mL) was heated at 120 °C for 12 h. Upon completion as shown by TLC, the reaction mixture was washed with brine, and the aqueous phase was extracted with ethyl acetate. The combined organic layers were dried over anhydrous  $\text{MgSO}_4$  and concentrated in vacuum. The residue was purified by flash chromatography on silica gel with petroleum ether/EtOAc as the eluent to afford the desired product **3**.

## Reference:

(S1) Y.-M. Li, S.-S. Wang, F.-C. Yu, Y. Shen and K.-J. Chang, *Org. Biomol. Chem.* 2015, **13**, 5376.

#### 4. Characterization of products

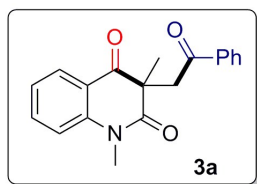

$^1\text{H}$  NMR (500 MHz,  $\text{CDCl}_3$ )  $\delta$  8.07 (d,  $J = 7.4$  Hz, 1H), 7.94 (d,  $J = 7.4$  Hz, 2H), 7.65 (t,  $J = 7.4$  Hz, 1H), 7.55 (t,  $J = 7.0$  Hz, 1H), 7.43 (t,  $J = 7.3$  Hz, 2H), 7.25 (d,  $J = 8.3$  Hz, 1H), 7.19 (t,  $J = 7.3$  Hz, 1H), 4.13–4.04 (m, 2H), 3.51 (s, 3H), 1.46 (s, 3H);  $^{13}\text{C}$  NMR (101 MHz,  $\text{CDCl}_3$ )  $\delta$  197.8, 196.5, 173.9, 143.3, 135.8, 135.7, 133.4, 128.5, 128.33, 128.29, 122.8, 119.6, 114.9, 53.4, 46.9, 29.8, 24.5; IR (KBr,  $\text{cm}^{-1}$ )  $\nu$  2968, 1691, 1674, 1657, 1599, 1387, 1344, 1292, 1222, 754, 554; HRMS (TOF-ESI) calc. for  $\text{C}_{19}\text{H}_{17}\text{NO}_3$  ( $\text{M}+\text{H}$ ) $^+$ , 308.1281; found, 308.1287.

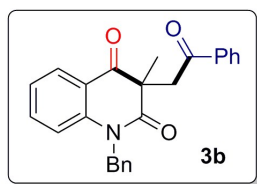

$^1\text{H}$  NMR (500 MHz,  $\text{CDCl}_3$ )  $\delta$  8.06 (d,  $J = 7.7$  Hz, 1H), 7.97 (d,  $J = 7.9$  Hz, 2H), 7.56–7.53 (m, 1H), 7.48–7.42 (m, 3H), 7.35–7.31 (m, 4H), 7.25–7.24 (m, 1H), 7.12 (t,  $J = 7.5$  Hz, 1H), 7.08 (d,  $J = 8.4$  Hz, 1H), 5.34 (s, 2H), 4.20–4.09 (m, 2H), 1.56 (s, 3H);  $^{13}\text{C}$  NMR (126 MHz,  $\text{CDCl}_3$ )  $\delta$  197.8, 196.3, 174.3, 142.4, 136.2, 135.8, 135.7, 133.5, 128.9, 128.5, 128.4, 128.3, 127.2, 126.2, 122.9, 119.8, 115.9, 53.6, 47.0, 46.0, 24.6; IR (KBr,  $\text{cm}^{-1}$ )  $\nu$  2927, 1666, 1599, 1489, 1379, 1319, 1253, 1221, 1185, 1110, 754, 530; HRMS (TOF-ESI) calc. for  $\text{C}_{25}\text{H}_{21}\text{NO}_3$  ( $\text{M}+\text{H}$ ) $^+$ , 384.1594; found, 384.1599.

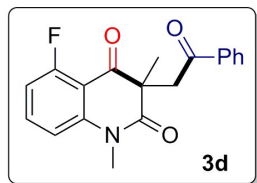

$^1\text{H}$  NMR (500 MHz,  $\text{CDCl}_3$ )  $\delta$  7.95–7.94 (m, 2H), 7.60–7.54 (m, 2H), 7.44 (t,  $J = 7.7$  Hz, 2H), 7.05 (d,  $J = 8.5$  Hz, 1H), 6.91–6.85 (m, 1H), 4.09–4.00 (m, 2H), 3.51 (s, 3H), 1.48 (s, 3H);  $^{13}\text{C}$  NMR (126 MHz,  $\text{CDCl}_3$ )  $\delta$  197.7, 193.7, 173.4, 163.7 (d,  $J_{\text{C-F}} = 266.0$  Hz), 144.5, 136.0 (d,  $J_{\text{C-F}} = 11.8$  Hz), 135.7, 133.5, 128.5, 128.3, 111.0 (d,  $J_{\text{C-F}} = 21.6$  Hz), 110.7 (d,  $J_{\text{C-F}} = 2.4$  Hz), 109.3 (d,  $J_{\text{C-F}} = 8.6$  Hz), 54.3, 46.2, 30.6, 24.2; IR (KBr,  $\text{cm}^{-1}$ )  $\nu$  2911, 1667, 1635, 1473, 1343, 1221, 1193, 1011, 838, 799, 698, 575; HRMS (TOF-ESI) calc. for  $\text{C}_{19}\text{H}_{16}\text{FNO}_3$  ( $\text{M}+\text{Na}$ ) $^+$ , 348.1006; found, 348.1010.

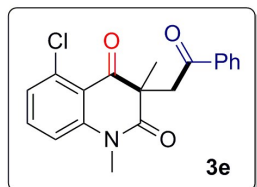

$^1\text{H}$  NMR (500 MHz,  $\text{CDCl}_3$ )  $\delta$  7.96–7.94 (m, 2H), 7.57–7.54 (m, 1H), 7.49 (t,  $J = 8.2$  Hz, 1H), 7.44 (t,  $J = 7.7$  Hz, 2H), 7.22 (dd,  $J = 8.0, 0.7$  Hz, 1H), 7.19 (d,  $J = 8.4$  Hz, 1H), 4.07–3.96 (m, 2H), 3.52 (s, 3H), 1.46 (s, 3H);  $^{13}\text{C}$  NMR (126 MHz,  $\text{CDCl}_3$ )  $\delta$  197.5, 194.1, 173.0, 145.1, 136.0, 135.9, 134.3, 133.4, 128.5, 128.3, 126.4, 117.4, 113.9, 54.5, 45.6, 30.8, 23.6; IR (KBr,  $\text{cm}^{-1}$ )  $\nu$  2929, 1667, 1581, 1453, 1339, 1284, 1222, 1138, 1201, 817, 745, 638, 535; HRMS (TOF-ESI) calc. for  $\text{C}_{19}\text{H}_{16}\text{ClNO}_3$  ( $\text{M}+\text{H}$ ) $^+$ , 342.0891; found, 342.0882.

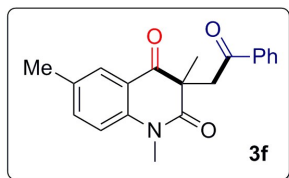

$^1\text{H}$  NMR (500 MHz,  $\text{CDCl}_3$ )  $\delta$  7.95–7.93 (m, 2H), 7.87 (s, 1H), 7.54 (t,  $J = 7.4$  Hz, 1H), 7.47–7.41 (m, 3H), 7.15 (d,  $J = 8.5$  Hz, 1H), 4.12–4.03 (m, 2H), 3.50 (s, 3H), 2.37 (s, 3H), 1.45 (s, 3H);  $^{13}\text{C}$  NMR (126 MHz,  $\text{CDCl}_3$ )  $\delta$  197.8, 196.7, 173.7, 141.2, 136.6, 135.7, 133.4, 132.5, 128.5, 128.30, 128.25, 119.3, 114.9, 53.3, 46.9, 29.8, 24.5, 20.3; IR (KBr,  $\text{cm}^{-1}$ )  $\nu$  2923, 1658, 1602, 1465, 1340, 1219, 1107, 820, 770, 686, 525; HRMS (TOF-ESI) calc. for  $\text{C}_{20}\text{H}_{19}\text{NO}_3$  ( $\text{M}+\text{H}$ ) $^+$ , 322.1438; found, 322.1440.

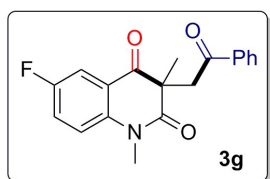

$^1\text{H}$  NMR (500 MHz,  $\text{CDCl}_3$ )  $\delta$  7.94–7.93 (m, 2H), 7.74 (dd,  $J = 8.1, 3.1$  Hz, 1H), 7.56 (t,  $J = 7.4$  Hz, 1H), 7.44 (t,  $J = 7.7$  Hz, 2H), 7.40–7.36 (m, 1H), 7.23 (dd,  $J = 9.1, 4.0$  Hz, 1H), 4.14–4.03 (m, 2H), 3.51 (s, 3H), 1.46 (s, 3H);  $^{13}\text{C}$  NMR (126 MHz,  $\text{CDCl}_3$ )  $\delta$  197.8, 195.7, 173.5, 158.4 (d,  $J_{\text{C-F}} = 244.6$  Hz), 139.7, 135.6, 133.6, 128.5, 128.3, 122.8 (d,  $J_{\text{C-F}} = 23.5$  Hz), 120.8 (d,  $J_{\text{C-F}} = 6.1$  Hz), 116.7 (d,  $J_{\text{C-F}} = 7.0$  Hz), 114.0 (d,  $J_{\text{C-F}} = 23.2$  Hz), 53.2, 47.2, 30.1, 24.4; IR (KBr,  $\text{cm}^{-1}$ )  $\nu$  2924, 1669, 1472, 1328, 1166, 1098, 1005, 774, 688, 621, 552; HRMS (TOF-ESI) calc. for  $\text{C}_{19}\text{H}_{16}\text{FNO}_3$  ( $\text{M}+\text{H}$ ) $^+$ , 326.1187; found, 326.1187.

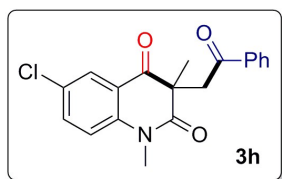

$^1\text{H}$  NMR (500 MHz,  $\text{CDCl}_3$ )  $\delta$  8.02 (d,  $J = 2.6$  Hz, 1H), 7.94–7.93 (m, 2H), 7.60 (dd,  $J = 8.9, 2.6$  Hz, 1H), 7.56 (t,  $J = 7.4$  Hz, 1H), 7.44 (t,  $J = 7.8$  Hz, 2H), 7.20 (d,  $J = 8.9$  Hz, 1H), 4.14–4.04 (m, 2H), 3.50 (s, 3H), 1.46 (s, 3H);  $^{13}\text{C}$  NMR (101 MHz,  $\text{CDCl}_3$ )  $\delta$  197.8, 195.4, 173.6, 141.8, 135.53, 135.46, 133.6, 128.7, 128.6, 128.3, 127.8, 120.6, 116.6, 53.5, 47.2, 30.0, 24.3; IR (KBr,  $\text{cm}^{-1}$ )  $\nu$  2976, 1662, 1467, 1428, 1333, 1187, 1137, 1106, 929, 758, 688, 562; HRMS (TOF-ESI) calc. for  $\text{C}_{19}\text{H}_{16}\text{ClNO}_3$  ( $\text{M}+\text{H}$ ) $^+$ , 342.0891; found, 342.0894.

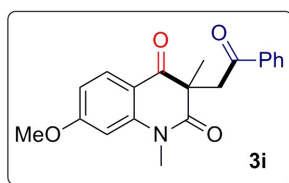

$^1\text{H}$  NMR (500 MHz,  $\text{CDCl}_3$ )  $\delta$  8.03 (d,  $J = 8.6$  Hz, 1H), 7.94 (d,  $J = 7.9$  Hz, 2H), 7.53 (t,  $J = 7.3$  Hz, 1H), 7.42 (t,  $J = 7.6$  Hz, 2H), 6.72–6.69 (m, 2H), 4.05 (s, 2H), 3.90 (s, 3H), 3.48 (s, 3H), 1.45 (s, 3H);  $^{13}\text{C}$  NMR (126 MHz,  $\text{CDCl}_3$ )  $\delta$  197.8, 195.0, 174.3, 165.7, 145.2, 135.7, 133.3, 130.6, 128.4, 128.2, 113.5, 108.1, 100.8, 55.6, 53.0, 46.7, 29.7, 24.8; IR (KBr,  $\text{cm}^{-1}$ )  $\nu$  2928, 1651, 1600, 1452, 1336, 1226, 1100, 1030, 839, 741, 541; HRMS (TOF-ESI) calc. for  $\text{C}_{20}\text{H}_{19}\text{NO}_4$  ( $\text{M}+\text{H}$ ) $^+$ , 338.1387; found, 338.1390.

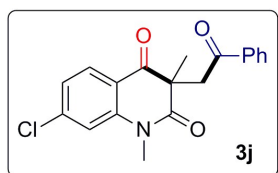

$^1\text{H}$  NMR (500 MHz,  $\text{CDCl}_3$ )  $\delta$  8.00 (d,  $J = 8.3$  Hz, 1H), 7.93 (d,  $J = 7.4$  Hz, 2H), 7.55 (t,  $J = 7.3$  Hz, 1H), 7.42 (t,  $J = 6.9$  Hz, 2H), 7.25 (s, 1H), 7.17 (d,  $J = 8.3$  Hz, 1H), 4.13–4.04 (m, 2H), 3.49 (s, 3H), 1.45 (s, 3H);  $^{13}\text{C}$  NMR (101 MHz,  $\text{CDCl}_3$ )  $\delta$  197.8, 195.4, 173.9, 144.3, 142.2, 135.5, 133.6, 129.8, 128.5, 128.3, 123.1, 118.0, 115.2, 53.5, 47.1, 31.0, 24.4; IR (KBr,  $\text{cm}^{-1}$ )  $\nu$  2956, 1667, 1596, 1461, 1431, 1378, 1330, 1291, 1100, 868, 760, 688; HRMS (TOF-ESI) calc. for  $\text{C}_{19}\text{H}_{16}\text{ClNO}_3$  ( $\text{M}+\text{Na}$ ) $^+$ , 364.0711; found, 364.0716.

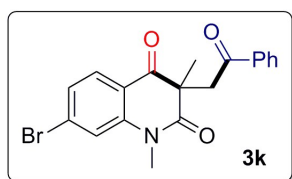

$^1\text{H}$  NMR (500 MHz,  $\text{CDCl}_3$ )  $\delta$  7.94–7.91 (m, 3H), 7.56 (t,  $J = 7.4$  Hz, 1H), 7.45–7.42 (m, 3H), 7.34 (dd,  $J = 8.3, 1.6$  Hz, 1H), 4.12–4.03 (m, 2H), 3.50 (s, 3H), 1.46 (s, 3H);  $^{13}\text{C}$  NMR (126 MHz,  $\text{CDCl}_3$ )  $\delta$  197.8, 195.6, 173.9, 144.2, 135.5, 133.6, 130.9, 129.7, 128.5, 128.3, 126.1, 118.3, 118.2, 53.5, 47.2, 30.0, 24.4; IR (KBr,  $\text{cm}^{-1}$ )  $\nu$  2924, 1664, 1599, 1459, 1429, 1332, 1292, 1221, 1027, 907, 730, 533; HRMS (TOF-ESI) calc. for  $\text{C}_{19}\text{H}_{16}\text{BrNO}_3$  ( $\text{M}+\text{Na}$ ) $^+$ , 408.0206; found, 408.0208.

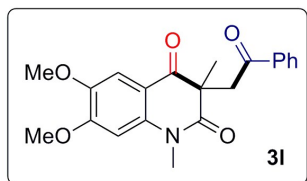

$^1\text{H}$  NMR (500 MHz,  $\text{CDCl}_3$ )  $\delta$  7.95 (dd,  $J = 8.4, 1.2$  Hz, 1H), 7.57–7.52 (m, 2H), 7.45–7.42 (m, 2H), 6.71 (s, 1H), 4.07 (s, 2H), 4.03 (s, 3H), 3.92 (s, 3H), 3.53 (s, 3H), 1.46 (s, 3H);  $^{13}\text{C}$  NMR (126 MHz,  $\text{CDCl}_3$ )  $\delta$  197.9, 195.3, 174.3, 155.5, 145.1, 139.5, 134.5, 133.4, 128.5, 128.3, 112.3, 109.1, 98.3, 56.3, 56.2, 52.9, 47.1, 29.9, 25.0; IR (KBr,  $\text{cm}^{-1}$ )  $\nu$  2927, 1679, 1645, 1068, 1481, 1425, 1306, 1249, 1031, 734, 563; HRMS (TOF-ESI) calc. for  $\text{C}_{21}\text{H}_{21}\text{NO}_5$  ( $\text{M}+\text{Na}$ ) $^+$ , 390.1312; found, 390.1312.

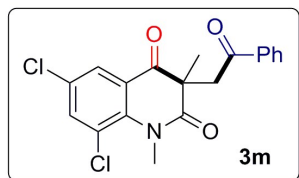

$^1\text{H}$  NMR (500 MHz,  $\text{CDCl}_3$ )  $\delta$  7.96–7.94 (m, 2H), 7.86 (d,  $J = 2.5$  Hz, 1H), 7.65 (d,  $J = 2.5$  Hz, 1H), 7.58 (t,  $J = 7.4$  Hz, 1H), 7.46 (t,  $J = 7.7$  Hz, 2H), 4.12–3.96 (m, 2H), 3.62 (s, 3H), 1.43 (s, 3H);  $^{13}\text{C}$  NMR (101 MHz,  $\text{CDCl}_3$ )  $\delta$  197.5, 195.1, 174.4, 141.0, 137.3, 135.6, 133.6, 129.7, 128.6, 128.4, 126.6, 124.5, 123.5, 53.6, 47.0, 37.8, 23.1; IR (KBr,  $\text{cm}^{-1}$ )  $\nu$  2926, 1703, 1668, 1649, 1613, 1453, 1334, 1221, 885, 528; HRMS (TOF-ESI) calc. for  $\text{C}_{19}\text{H}_{15}\text{Cl}_2\text{NO}_3$  ( $\text{M}+\text{H}$ ) $^+$ , 376.0502; found, 376.0503.

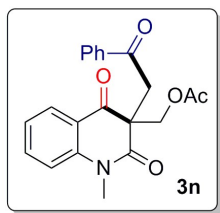

$^1\text{H}$  NMR (500 MHz,  $\text{CDCl}_3$ )  $\delta$  8.03 (d,  $J = 7.7$  Hz, 1H), 7.91 (d,  $J = 8.2$  Hz, 2H), 7.68–7.65 (m, 1H), 7.56 (t,  $J = 7.4$  Hz, 1H), 7.43 (t,  $J = 7.7$  Hz, 2H), 7.26 (d,  $J = 7.9$  Hz, 1H), 7.20 (t,  $J = 7.5$  Hz, 1H), 4.47–4.38 (m, 2H), 4.13–4.06 (m, 2H), 3.52 (s, 3H), 1.79 (s, 3H);  $^{13}\text{C}$  NMR (126 MHz,  $\text{CDCl}_3$ )  $\delta$  196.8, 194.3, 171.1, 169.7, 143.4, 136.0, 135.4, 133.7, 128.6, 128.3, 127.8, 122.9, 121.0, 114.9, 68.6, 57.1, 44.3, 30.0, 20.2; IR (KBr,  $\text{cm}^{-1}$ )  $\nu$  2921, 1643, 1569, 1464, 1381, 1227, 1014, 752, 608; HRMS (TOF-ESI) calc. for  $\text{C}_{21}\text{H}_{19}\text{NO}_5$  ( $\text{M}+\text{H}$ ) $^+$ , 366.1336; found, 366.1336.

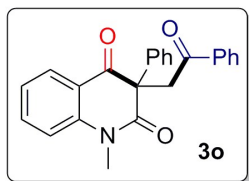

$^1\text{H}$  NMR (500 MHz,  $\text{CDCl}_3$ )  $\delta$  8.02 (dd,  $J = 7.7, 1.3$  Hz, 1H), 7.95 (d,  $J = 7.4$  Hz, 2H), 7.59–7.53 (m, 2H), 7.43–7.40 (m, 2H), 7.34 (d,  $J = 7.5$  Hz, 1H), 7.30–7.24 (m, 1H), 7.17 (d,  $J = 8.4$  Hz, 1H), 7.13 (t,  $J = 7.5$  Hz, 1H), 4.40–4.33 (m, 2H), 3.57 (s, 3H);  $^{13}\text{C}$  NMR (126 MHz,  $\text{CDCl}_3$ )  $\delta$  197.7, 194.0, 171.5, 143.0, 135.7, 135.5, 133.5, 129.1, 128.5, 128.3, 128.1, 126.9, 122.9, 121.0, 114.9, 62.7, 48.5, 30.1; IR (KBr,  $\text{cm}^{-1}$ )  $\nu$  2920, 1642, 1548, 1462, 1390, 1310, 1215, 1161, 1085, 670; HRMS (TOF-ESI) calc. for  $\text{C}_{24}\text{H}_{19}\text{NO}_3$  ( $\text{M}+\text{H}$ ) $^+$ , 370.1438; found, 370.1438.

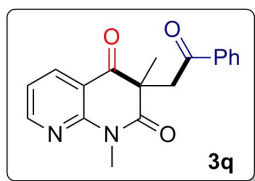

$^1\text{H}$  NMR (500 MHz,  $\text{CDCl}_3$ )  $\delta$  8.65 (dd,  $J = 4.7, 1.8$  Hz, 1H), 8.30 (dd,  $J = 7.6, 1.8$  Hz, 1H), 7.93 (d,  $J = 7.5$  Hz, 2H), 7.57 (t,  $J = 7.4$  Hz, 1H), 7.44 (t,  $J = 7.7$  Hz, 2H), 7.15 (dd,  $J = 7.6, 4.8$  Hz, 1H), 4.17–4.02 (m, 2H), 3.64 (s, 3H), 1.49 (s, 3H);  $^{13}\text{C}$  NMR (101 MHz,  $\text{CDCl}_3$ )  $\delta$  197.9, 196.1, 174.5, 154.4, 154.1, 136.8, 135.5, 133.7, 128.6, 128.4, 118.7, 114.9, 53.7, 47.3, 28.8, 24.4; IR (KBr,  $\text{cm}^{-1}$ )  $\nu$  2921, 1645, 1568, 1551, 1514, 1461, 1388, 720, 609, 517; HRMS (TOF-ESI) calc. for  $\text{C}_{18}\text{H}_{16}\text{N}_2\text{O}_3$  ( $\text{M}+\text{H}$ ) $^+$ , 309.1234; found, 309.1235.

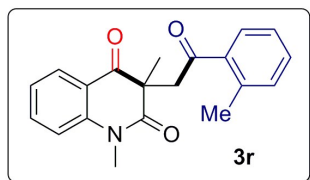

$^1\text{H}$  NMR (500 MHz,  $\text{CDCl}_3$ )  $\delta$  8.07–8.05 (m, 1H), 7.82 (d,  $J = 7.6$  Hz, 1H), 7.67–7.63 (m, 1H), 7.37–7.34 (m, 1H), 7.28–7.22 (m, 2H), 7.21–7.18 (m, 2H), 4.04–3.96 (m, 2H), 3.51 (s, 3H), 2.38 (s, 3H), 1.43 (s, 3H);  $^{13}\text{C}$  NMR (126 MHz,  $\text{CDCl}_3$ )  $\delta$  201.4, 196.5, 173.9, 143.3, 138.5, 136.2, 135.8, 131.8, 131.6, 129.0, 128.3, 125.6, 122.8, 119.6, 114.9, 53.8, 49.1, 29.8, 24.5, 21.3; IR (KBr,  $\text{cm}^{-1}$ )  $\nu$  2929, 1699, 1676, 1657, 1608, 1467, 1345, 1208, 1161, 1101, 788, 513; HRMS (TOF-ESI) calc. for  $\text{C}_{20}\text{H}_{19}\text{NO}_3$  ( $\text{M}+\text{H}$ ) $^+$ , 322.1438; found, 322.1444.

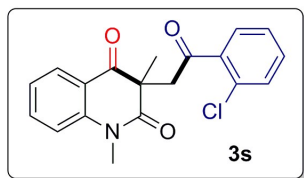

$^1\text{H}$  NMR (400 MHz,  $\text{CDCl}_3$ )  $\delta$  8.07 (dd,  $J = 7.7, 1.3$  Hz, 1H), 7.68–7.64 (m, 2H), 7.42–7.36 (m, 2H), 7.33–7.18 (m, 3H), 4.13–3.98 (m, 2H), 3.52 (s, 3H), 1.44 (s, 3H);  $^{13}\text{C}$  NMR (101 MHz,  $\text{CDCl}_3$ )  $\delta$  199.8, 196.3, 173.6, 143.3, 137.0, 135.9, 132.3, 131.8, 130.8, 130.0, 128.4, 126.8, 122.9, 119.6, 114.9, 54.1, 50.2, 29.9, 24.6; IR (KBr,  $\text{cm}^{-1}$ )  $\nu$  2911, 1651, 1601, 1468, 1397, 1352, 1101, 817, 688, 545; HRMS (TOF-ESI) calc. for  $\text{C}_{19}\text{H}_{16}\text{ClNO}_3$  ( $\text{M}+\text{H}$ ) $^+$ , 342.0891; found, 342.0904.

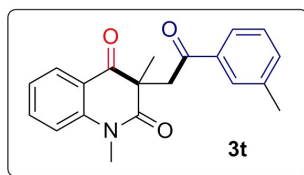

$^1\text{H}$  NMR (500 MHz,  $\text{CDCl}_3$ )  $\delta$  8.06 (dd,  $J = 7.7, 1.3$  Hz, 1H), 7.75–7.74 (m, 2H), 7.67–7.63 (m, 1H), 7.36 (d,  $J = 7.5$  Hz, 1H), 7.31 (t,  $J = 7.9$  Hz, 1H), 7.24 (d,  $J = 8.4$  Hz, 1H), 7.19 (t,  $J = 7.5$  Hz, 1H), 4.12–4.03 (m, 2H), 3.51 (s, 3H), 2.37 (s, 3H), 1.46 (s, 3H);  $^{13}\text{C}$  NMR (126 MHz,  $\text{CDCl}_3$ )  $\delta$  198.1, 196.5, 173.9, 143.3, 138.2, 135.8, 135.6, 134.2, 128.8, 128.3, 128.3, 125.5, 122.8, 119.5, 114.9, 53.4, 47.0, 29.8, 24.4, 21.2; IR (KBr,  $\text{cm}^{-1}$ )  $\nu$  2922, 1663, 1595, 1467, 1342, 1298, 1245, 1185, 1098, 767, 618, 521; HRMS (TOF-ESI) calc. for  $\text{C}_{20}\text{H}_{19}\text{NO}_3$  ( $\text{M}+\text{H}$ ) $^+$ , 322.1438; found, 322.1445.

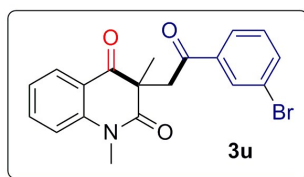

$^1\text{H}$  NMR (500 MHz,  $\text{CDCl}_3$ )  $\delta$  8.05 (d,  $J = 9.0$  Hz, 1H), 7.86 (d,  $J = 7.7$  Hz, 1H), 7.66 (t,  $J = 8.5$  Hz, 1H), 7.31 (t,  $J = 7.9$  Hz, 1H), 7.24 (d,  $J = 8.4$  Hz, 1H), 7.19 (t,  $J = 7.5$  Hz, 1H), 4.08–3.99 (m, 2H), 3.50 (s, 3H), 1.46 (s, 3H);  $^{13}\text{C}$  NMR (126 MHz,  $\text{CDCl}_3$ )  $\delta$  196.5, 196.2, 173.6, 143.2, 137.3, 136.2, 135.9, 131.3, 130.1, 128.3, 126.8, 122.9, 122.8, 119.5, 114.9, 53.5, 46.6, 29.8, 24.5; IR (KBr,  $\text{cm}^{-1}$ )  $\nu$  2922, 1681, 1639, 1618, 1568, 1464, 1209, 1101, 771, 521; HRMS (TOF-ESI) calc. for  $\text{C}_{19}\text{H}_{16}\text{BrNO}_3$  ( $\text{M}+\text{H}$ ) $^+$ , 386.0386; found, 386.0389.

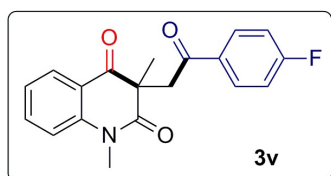

$^1\text{H}$  NMR (500 MHz,  $\text{CDCl}_3$ )  $\delta$  8.06 (dd,  $J = 7.7, 1.2$  Hz, 1H), 7.97 (dd,  $J = 8.7, 5.5$  Hz, 2H), 7.68–7.65 (m, 1H), 7.25 (d,  $J = 8.4$  Hz, 1H), 7.20 (t,  $J = 7.5$  Hz, 1H), 7.10 (t,  $J = 8.6$  Hz, 2H), 4.09–4.00 (m, 2H), 3.52 (s, 3H), 1.46 (s, 3H);  $^{13}\text{C}$  NMR (126 MHz,  $\text{CDCl}_3$ )  $\delta$  196.5, 196.2, 173.8, 166.0 (d,  $J_{\text{C-F}} = 255.3$  Hz), 143.3, 135.9, 132.2, 131.0 (d,  $J_{\text{C-F}} = 9.4$  Hz), 128.4, 122.9, 119.5, 115.6 (d,  $J_{\text{C-F}} = 21.9$  Hz), 114.9, 53.5, 46.7, 29.8, 24.5; IR (KBr,  $\text{cm}^{-1}$ )  $\nu$  2962, 1657, 1600, 1475, 1383, 1342, 1224, 1104, 843, 759, 557; HRMS (TOF-ESI) calc. for  $\text{C}_{19}\text{H}_{16}\text{FNO}_3$  ( $\text{M}+\text{H}$ ) $^+$ , 326.1187; found, 326.1191.

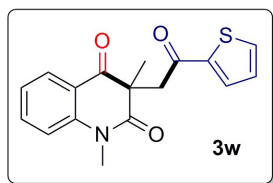

$^1\text{H}$  NMR (600 MHz,  $\text{CDCl}_3$ )  $\delta$  8.06 (d,  $J$  = 7.5 Hz, 1H), 7.79 (d,  $J$  = 3.4 Hz, 1H), 7.65 (t,  $J$  = 7.7 Hz, 1H), 7.62 (d,  $J$  = 4.8 Hz, 1H), 7.23 (d,  $J$  = 8.4 Hz, 1H), 7.19 (t,  $J$  = 7.5 Hz, 1H), 7.12 (t,  $J$  = 4.3 Hz, 1H), 4.08–3.98 (m, 2H), 3.51 (s, 3H), 1.45 (s, 3H).  $^{13}\text{C}$  NMR (151 MHz,  $\text{CDCl}_3$ )  $\delta$  196.3, 190.6, 173.7, 143.3, 142.5, 135.9, 133.95, 132.6, 128.4, 128.0, 122.9, 119.5, 114.9, 53.4, 47.1, 29.8, 24.5; IR (KBr,  $\text{cm}^{-1}$ )  $\nu$  2925, 1691, 1598, 1508, 1495, 1347, 1231, 1140, 853, 752, 692; HRMS (TOF-ESI) calc. for  $\text{C}_{17}\text{H}_{15}\text{NO}_3\text{S}$  ( $\text{M}+\text{H}^+$ ), 314.0845; found, 314.0846.

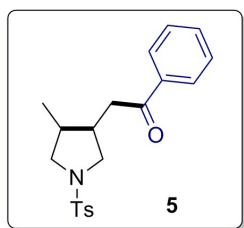

The compound is inseparable mixture.  $^1\text{H}$  NMR (500 MHz,  $\text{CDCl}_3$ )  $\delta$  7.89–7.84 (m, 2H), 7.73–7.70 (m, 2H), 7.59–7.56 (m, 1H), 7.48–7.44 (m, 2H), 7.33–7.27 (m, 2H), 3.68–3.39 (m, 2H), 3.11–1.87 (m, 9H), 0.97–0.82 (m, 3H);  $^{13}\text{C}$  NMR (101 MHz,  $\text{CDCl}_3$ )  $\delta$  198.4, 198.3, 143.4, 143.3, 136.6, 136.5, 133.9, 133.3, 133.3, 129.6, 128.7, 128.6, 127.91, 127.85, 127.6, 127.4, 54.3, 54.2, 53.2, 52.0, 41.2, 41.0, 38.7, 37.1, 36.5, 35.1, 21.50, 21.47, 16.4, 13.5; IR (KBr,  $\text{cm}^{-1}$ )  $\nu$  2921, 1641, 1514, 1461, 1390, 1159, 1049; HRMS (TOF-ESI) calc. for  $\text{C}_{20}\text{H}_{23}\text{NO}_3\text{S}$  ( $\text{M}+\text{H}^+$ ), 358.1471; found, 358.1474.



## 5. Charts of products

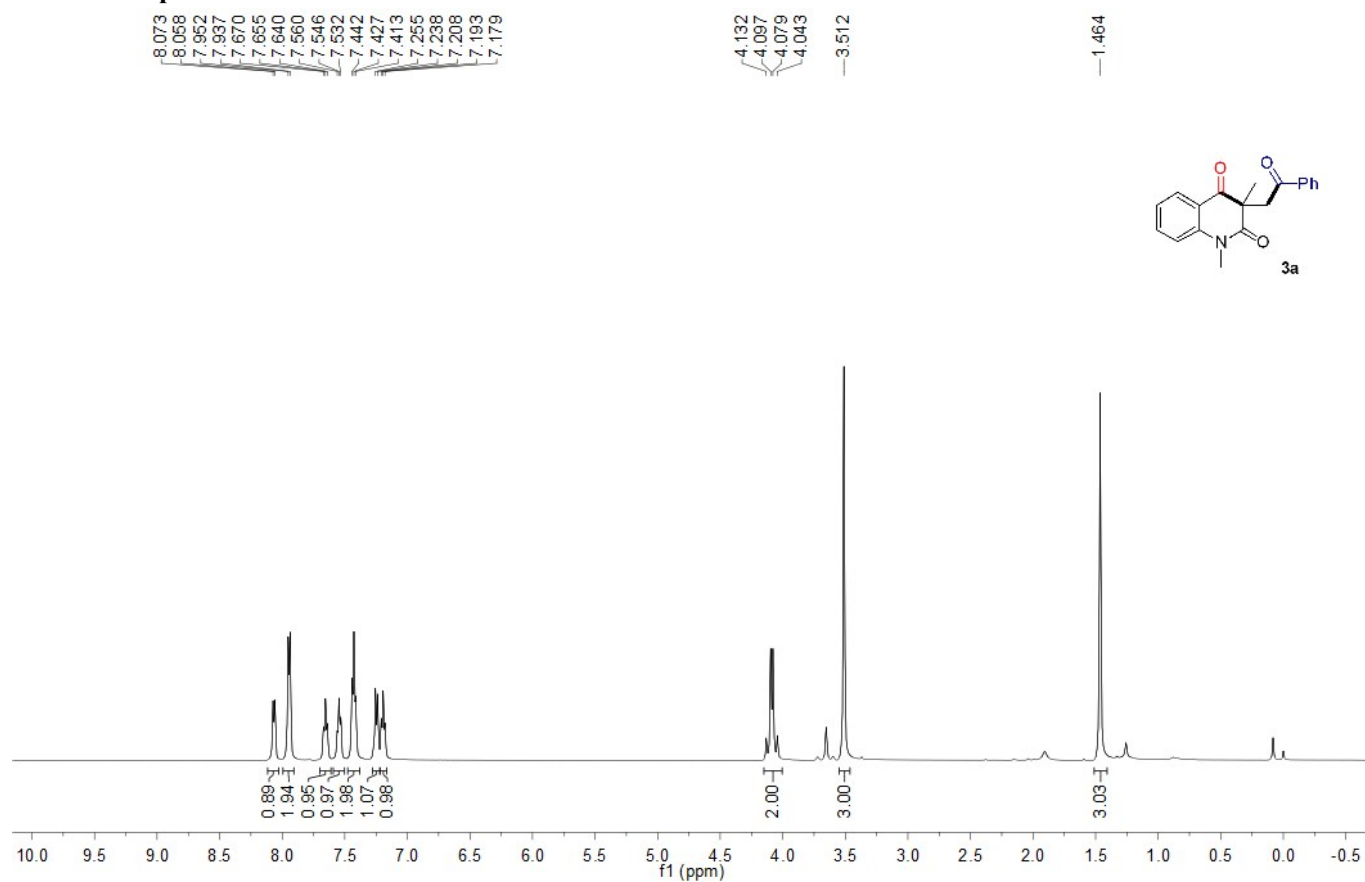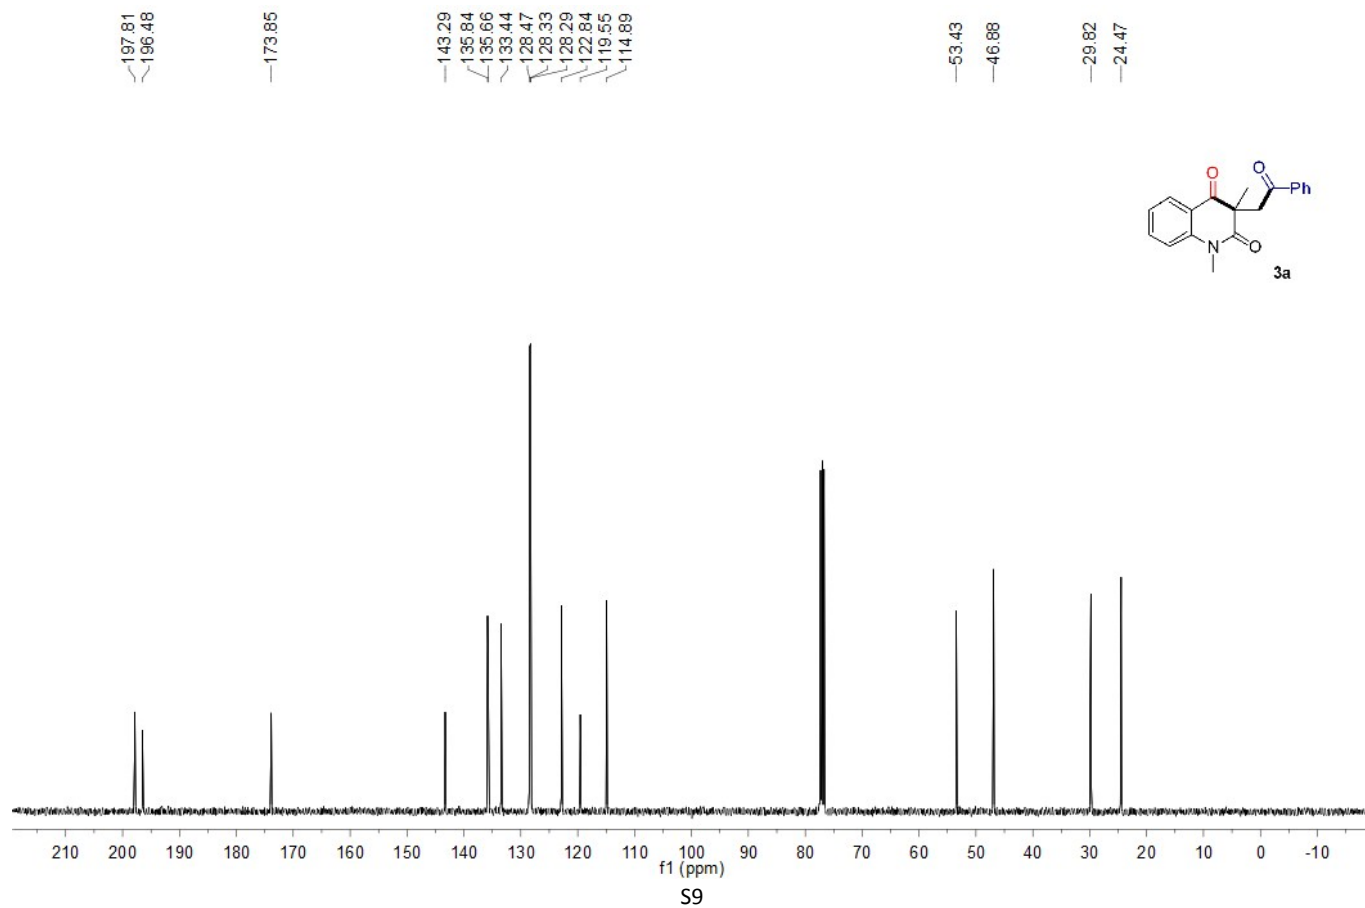

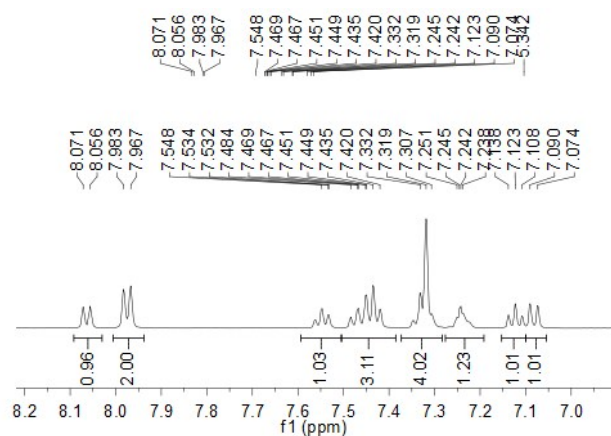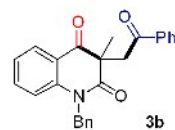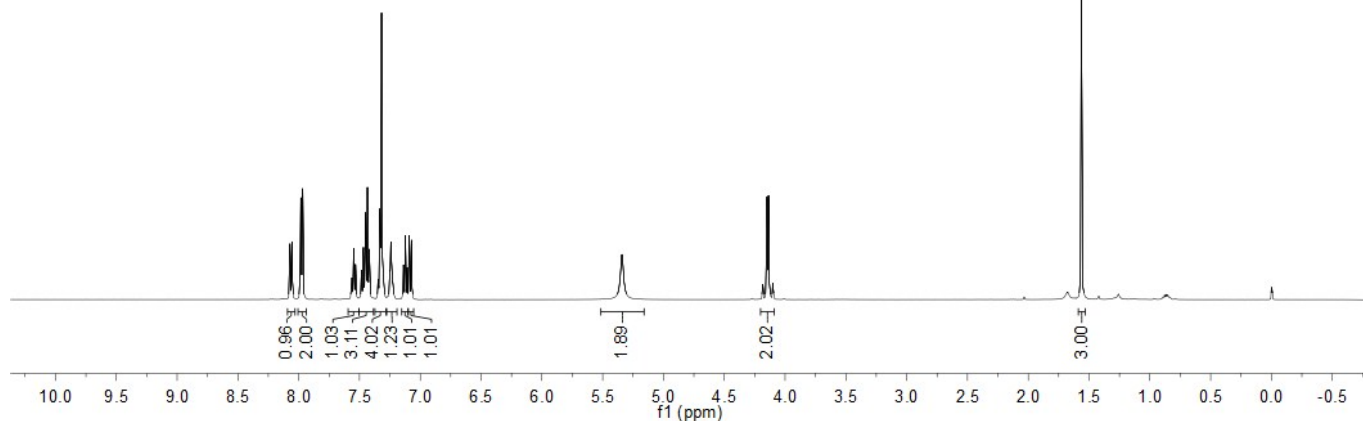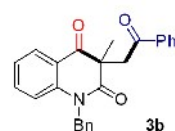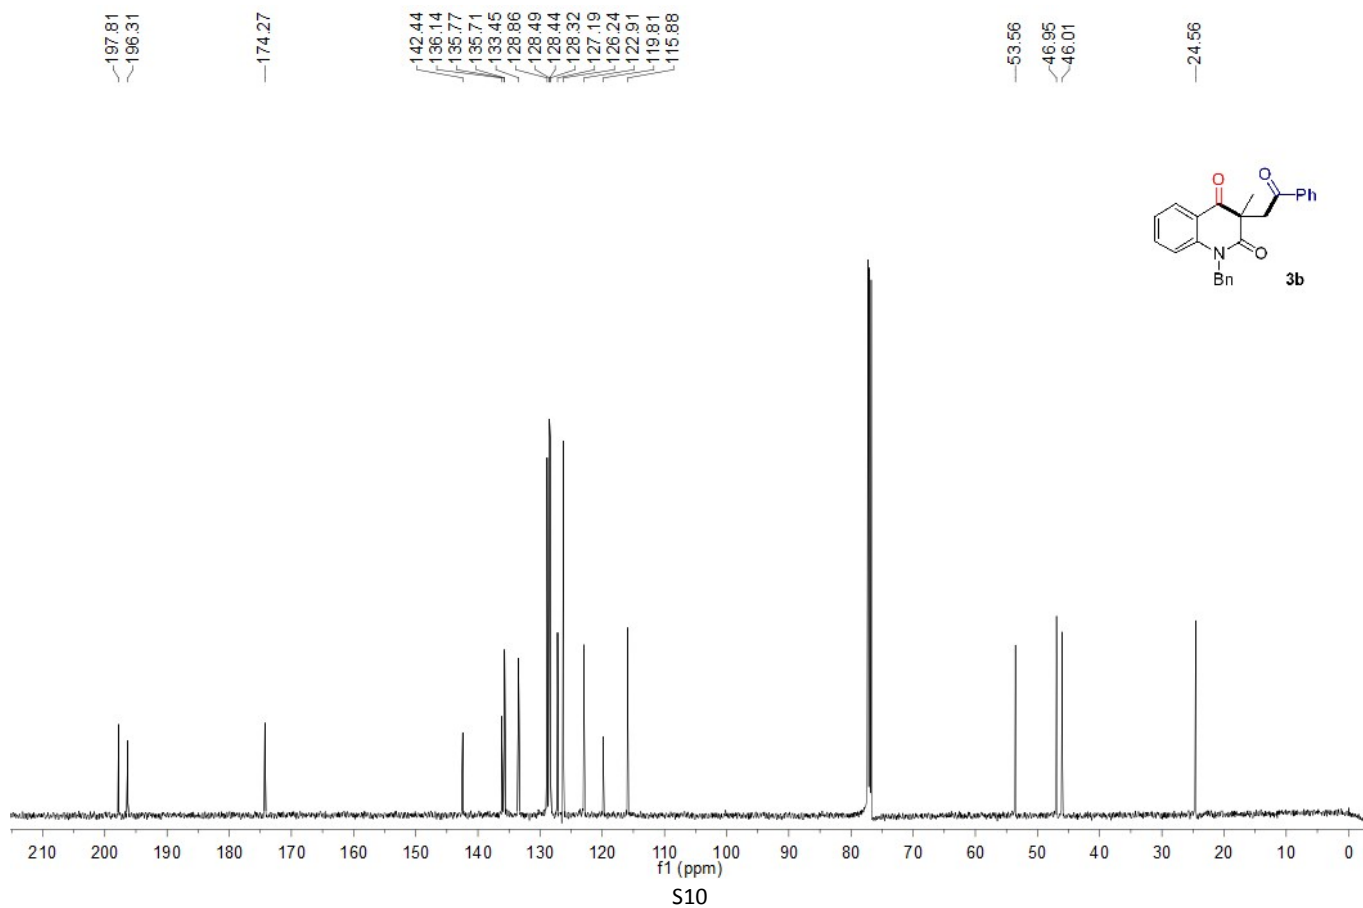

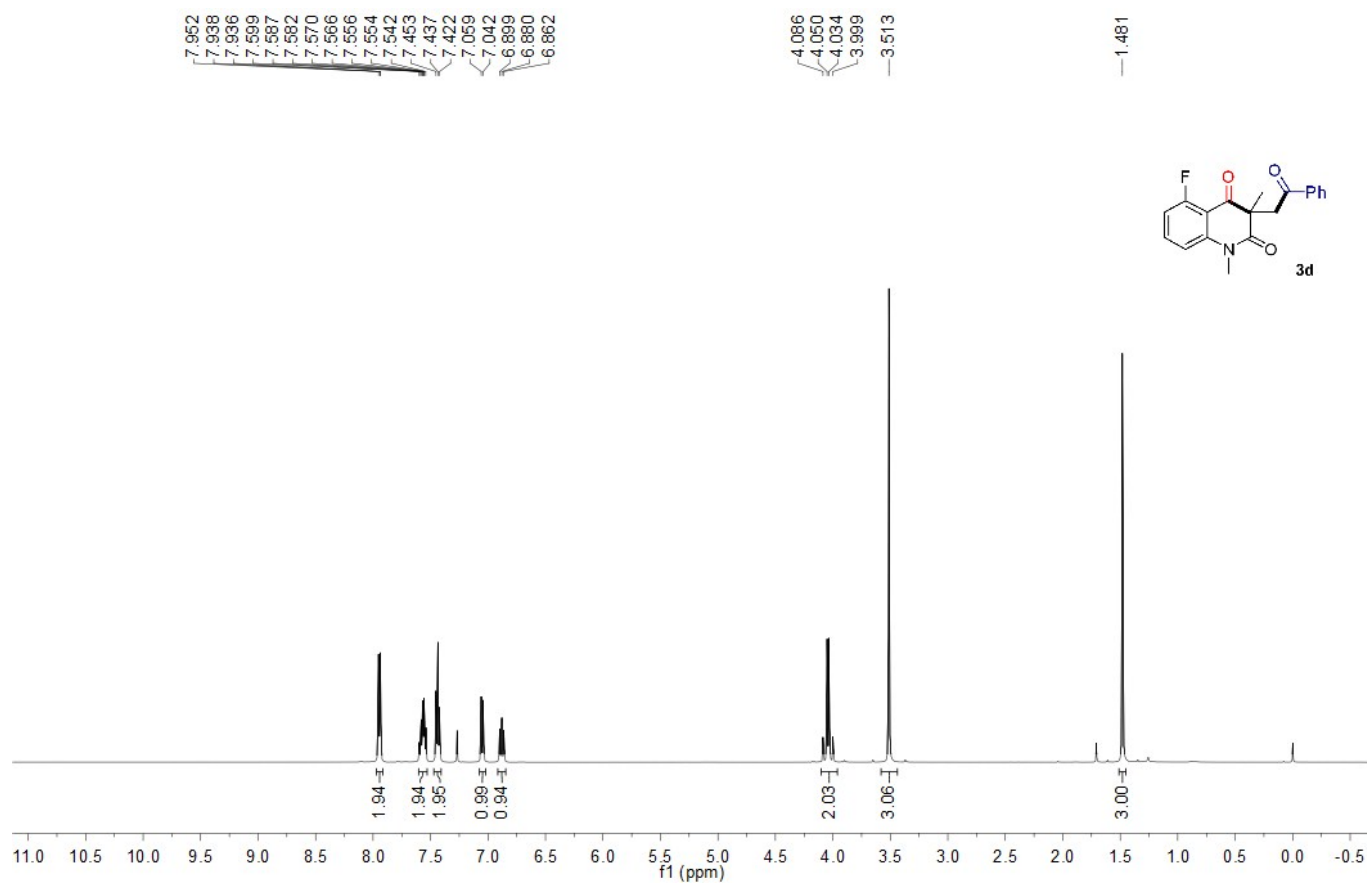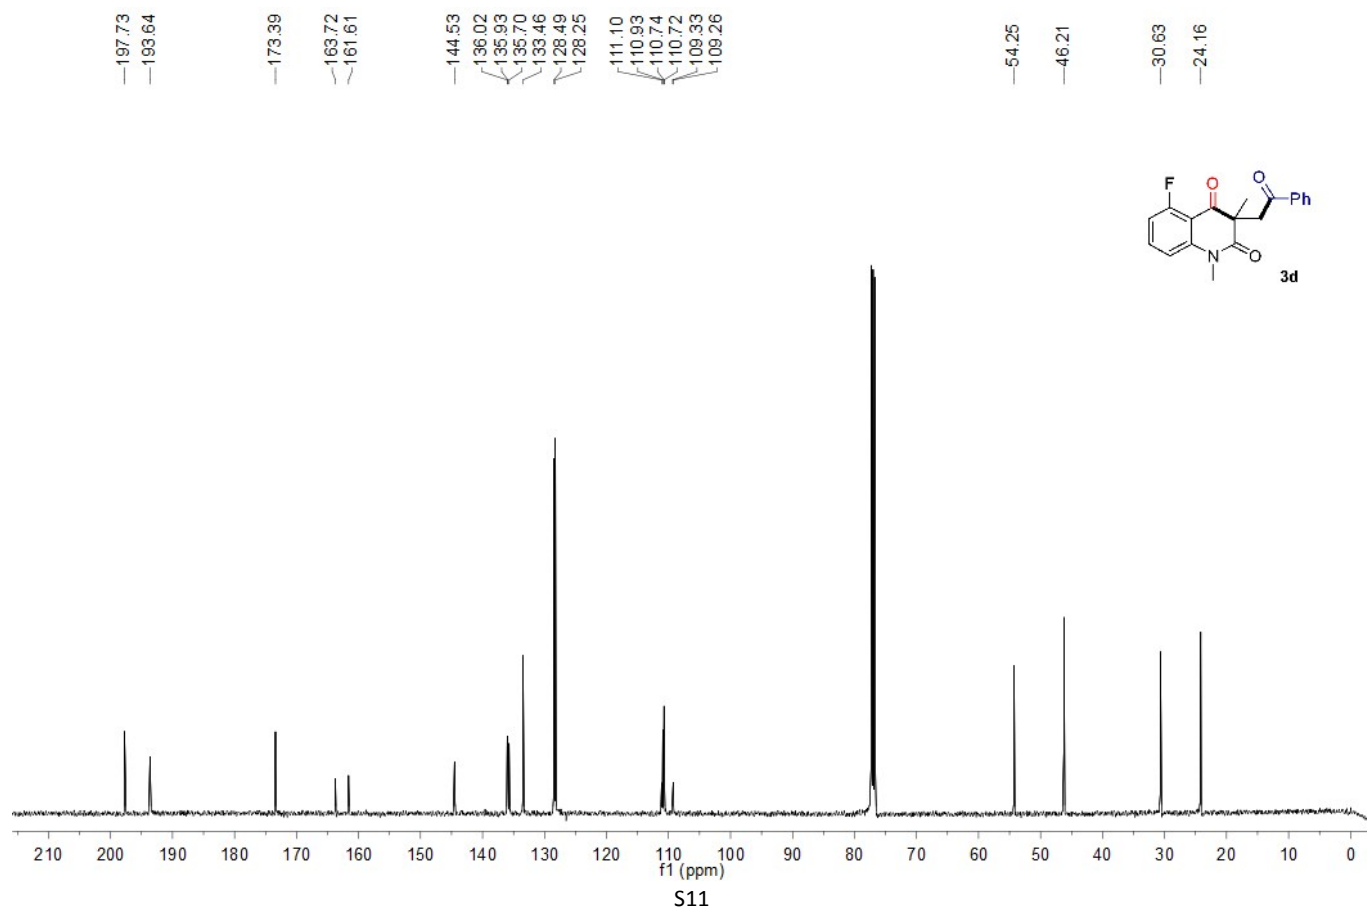

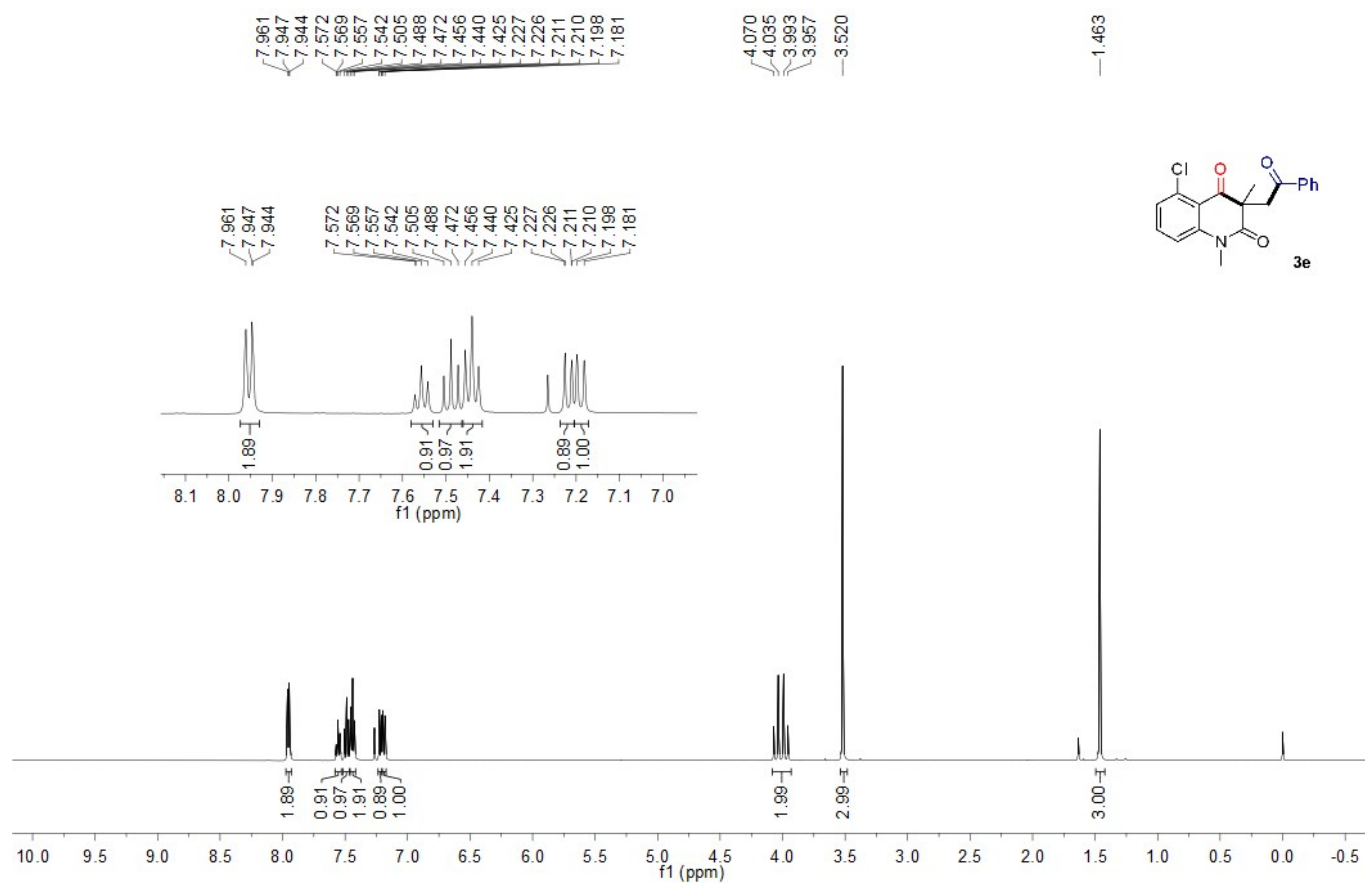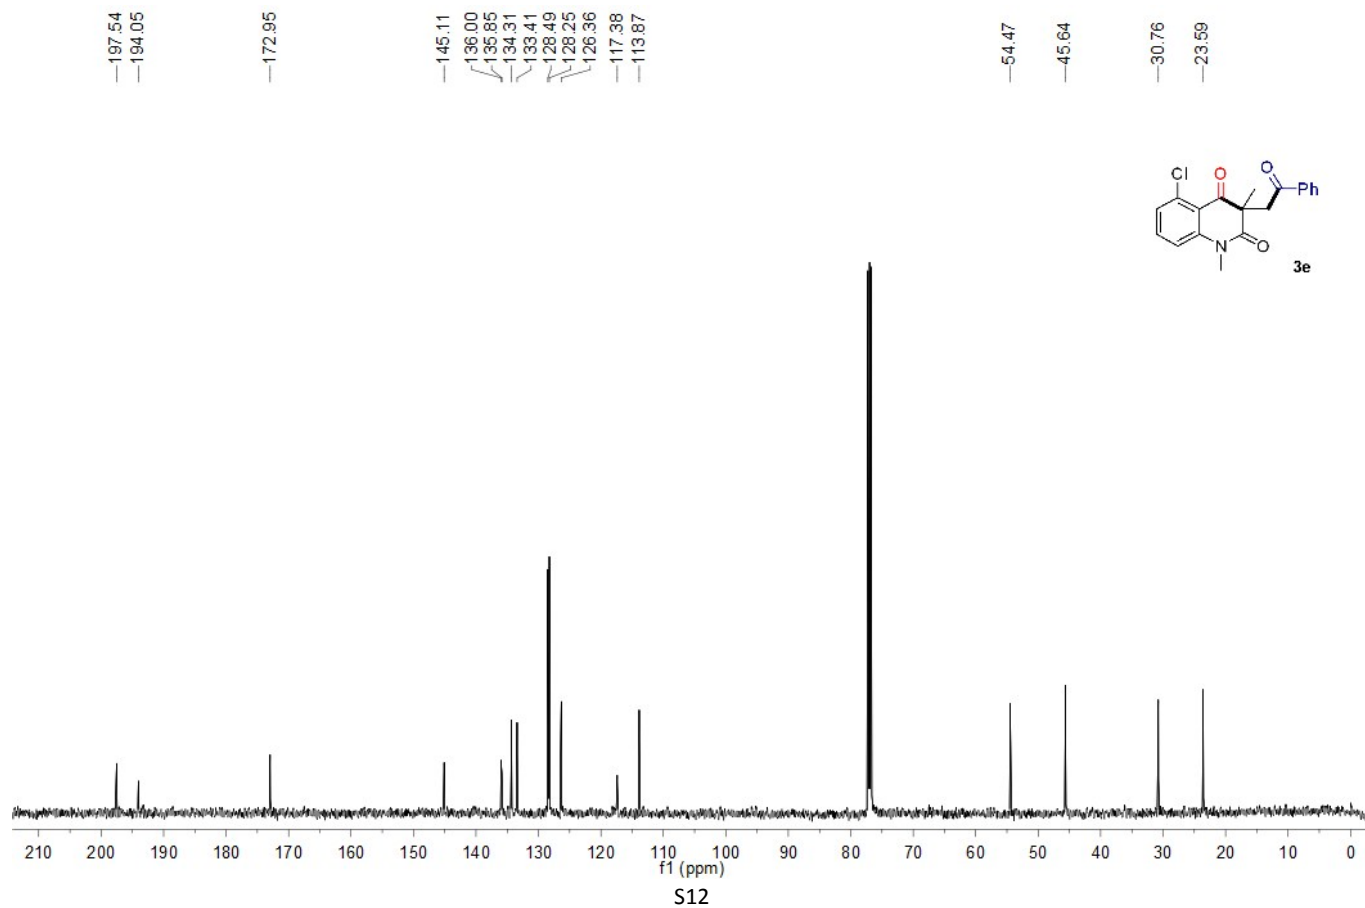

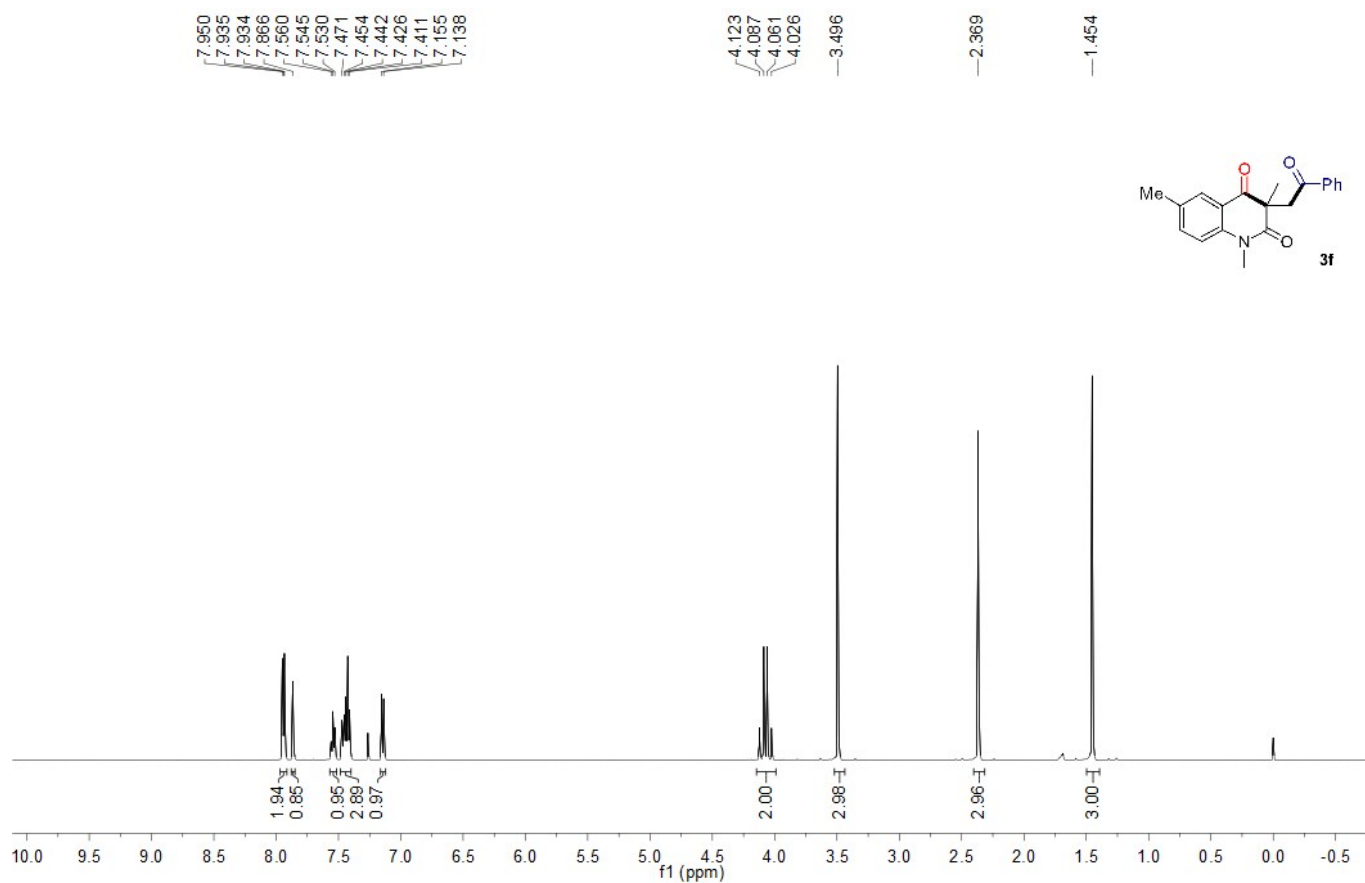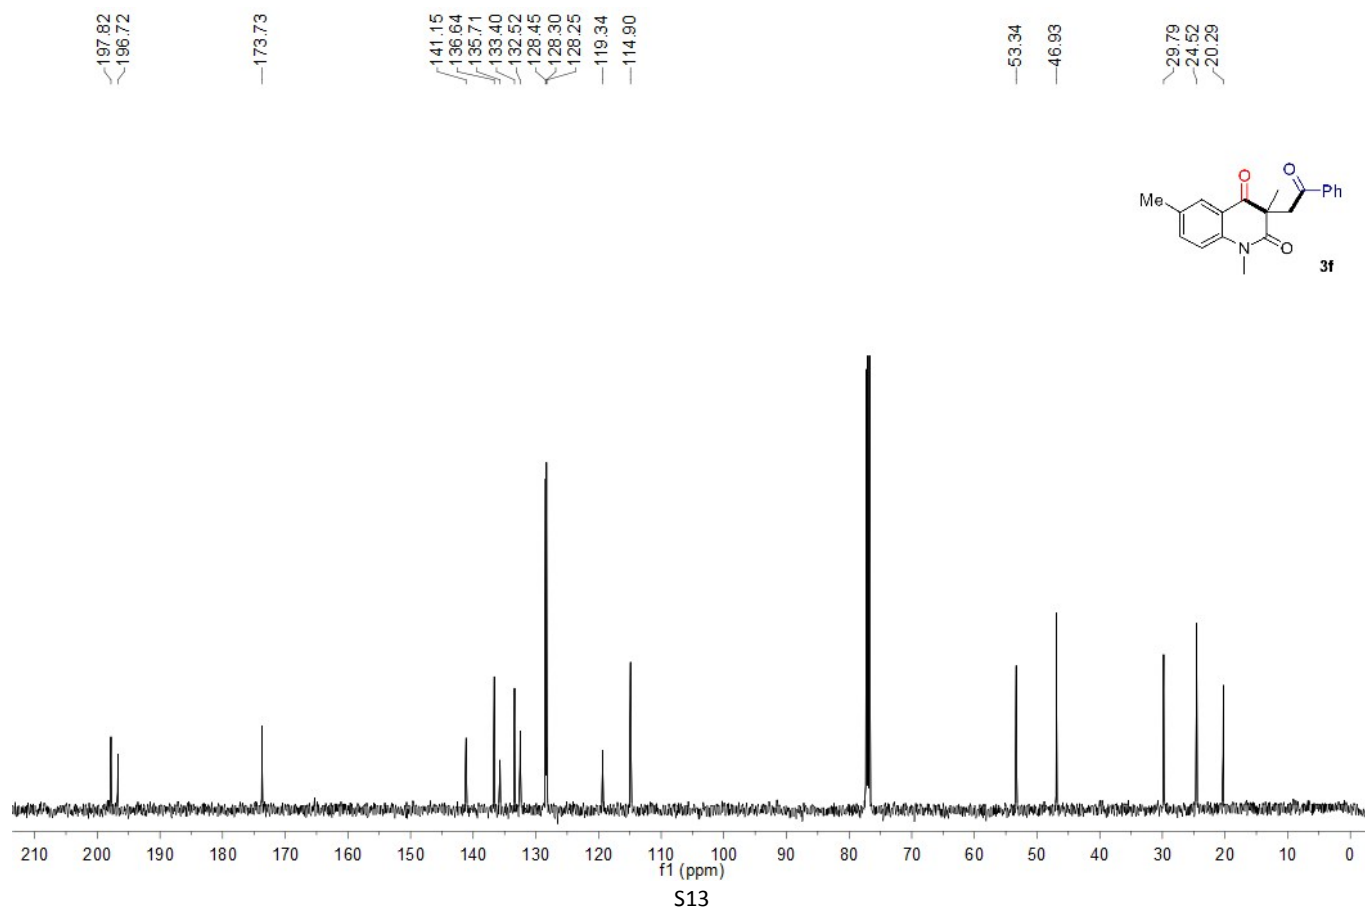

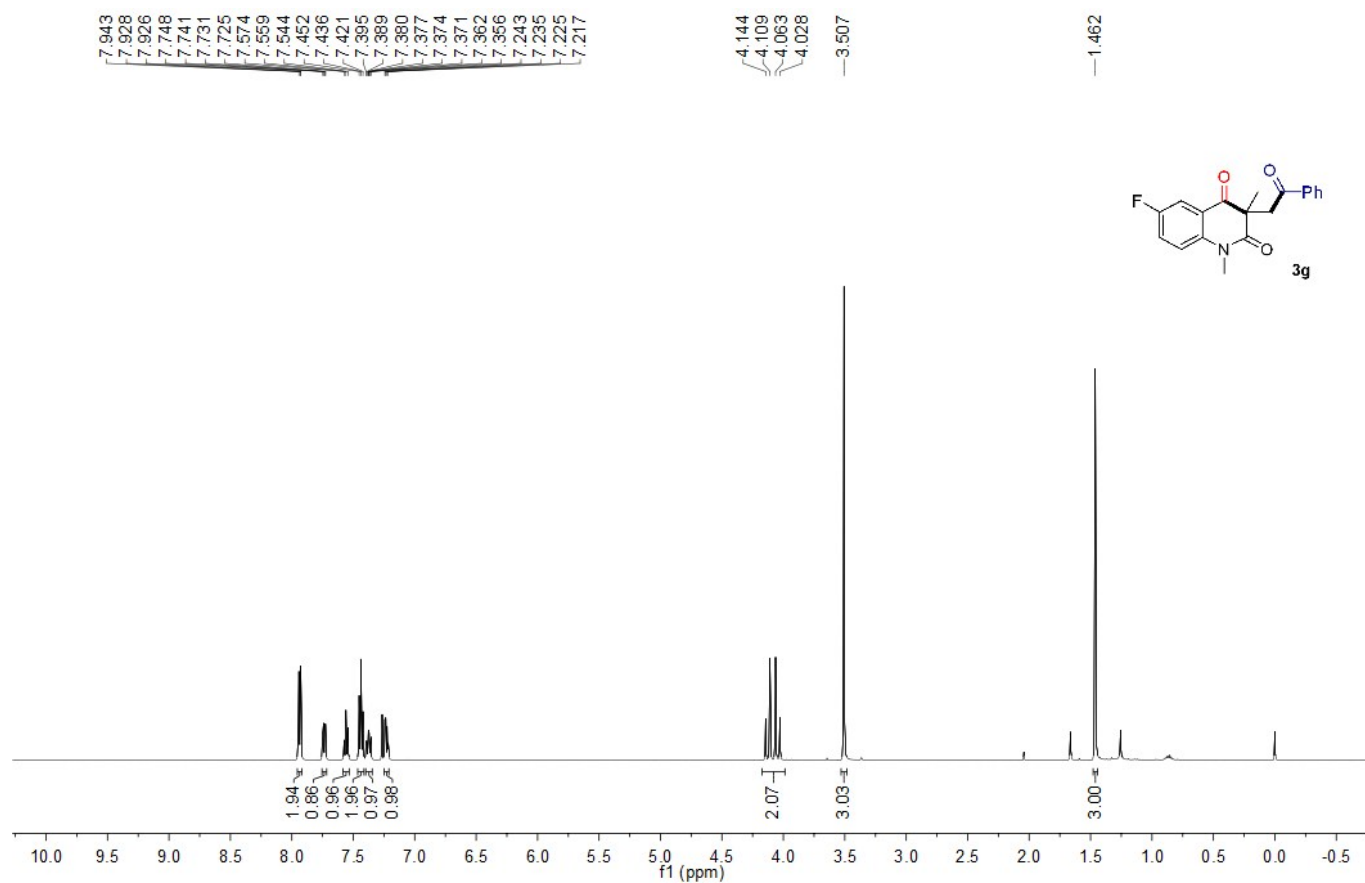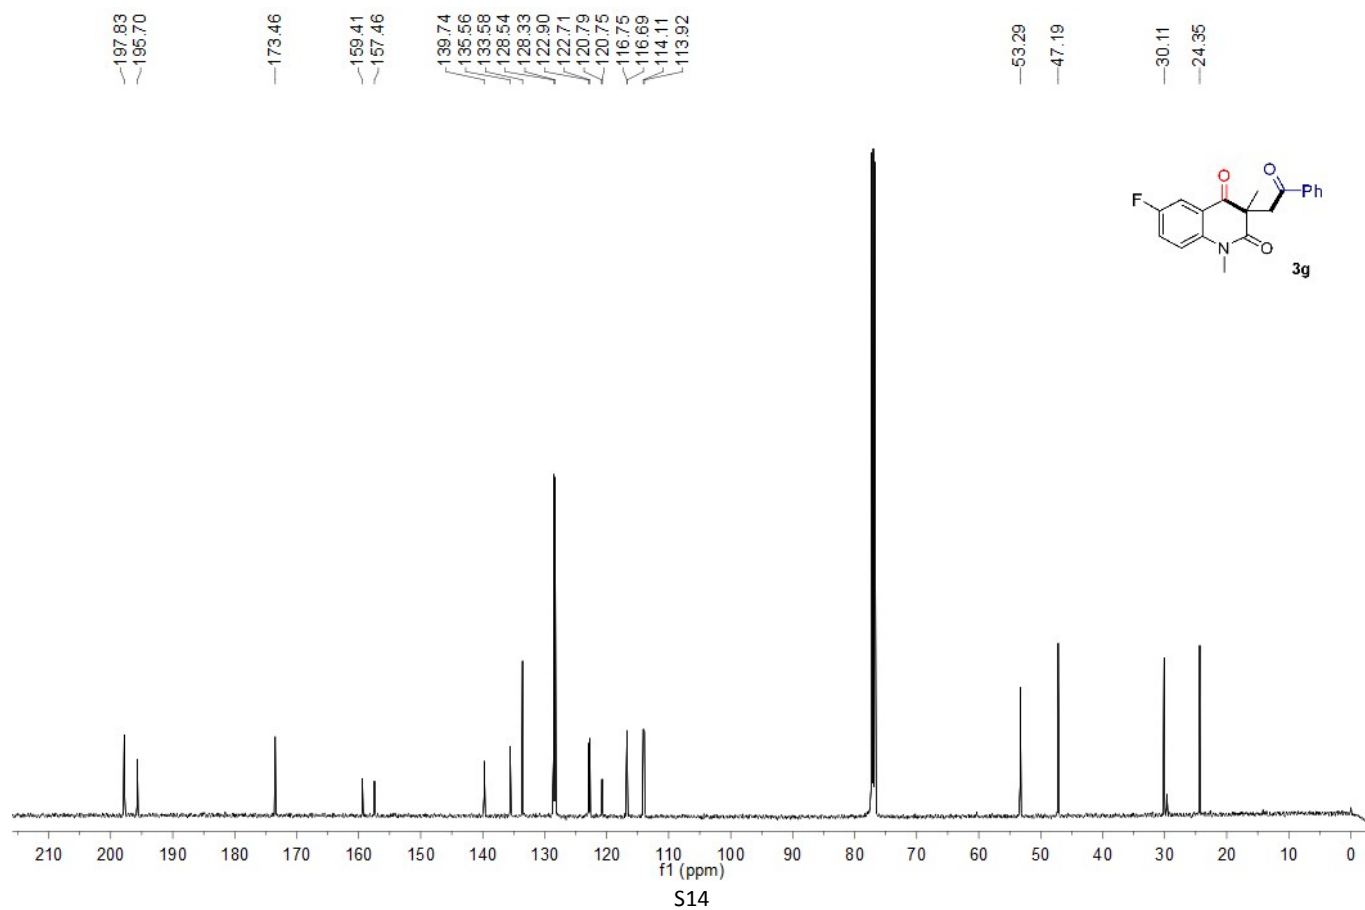

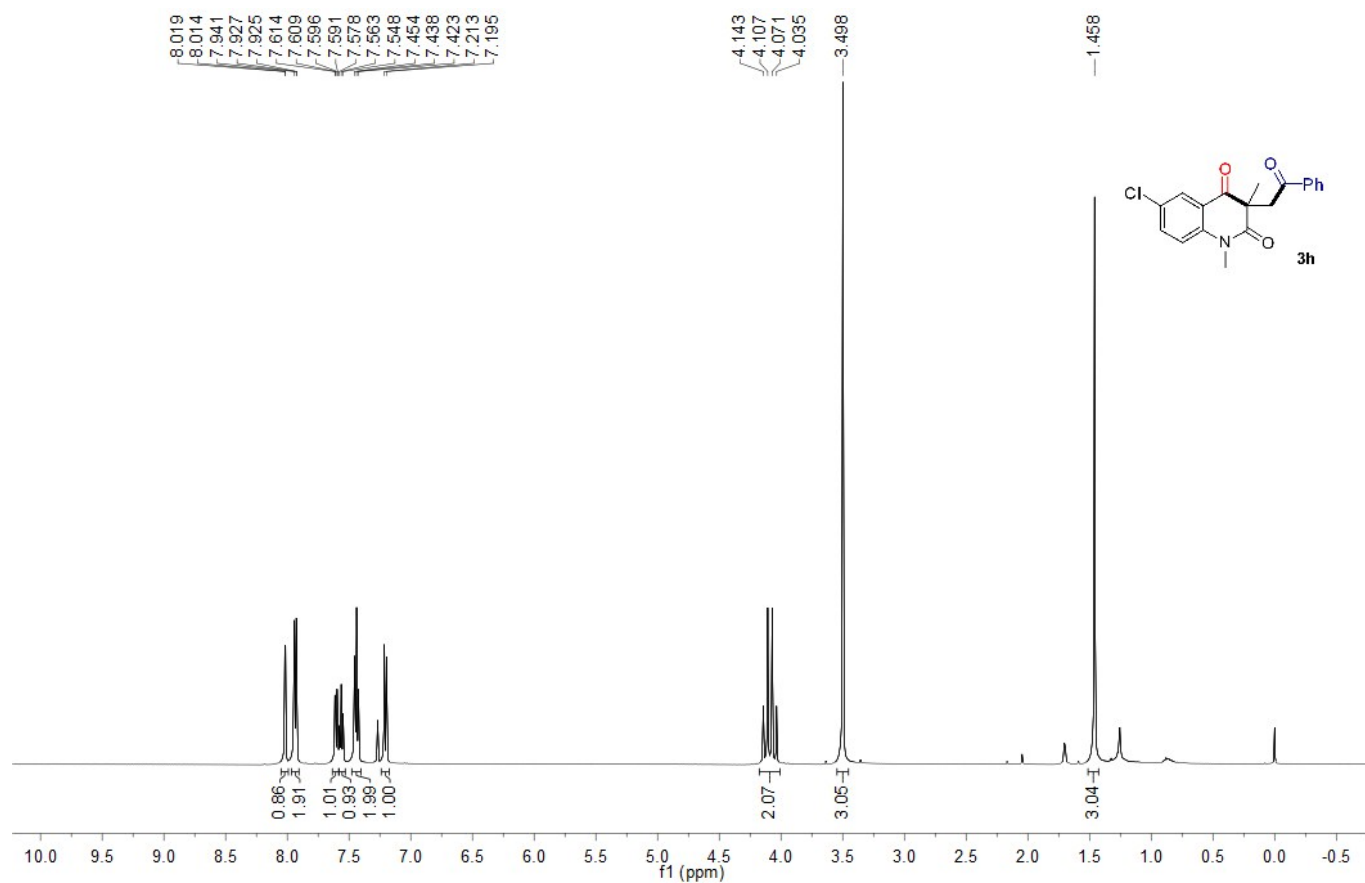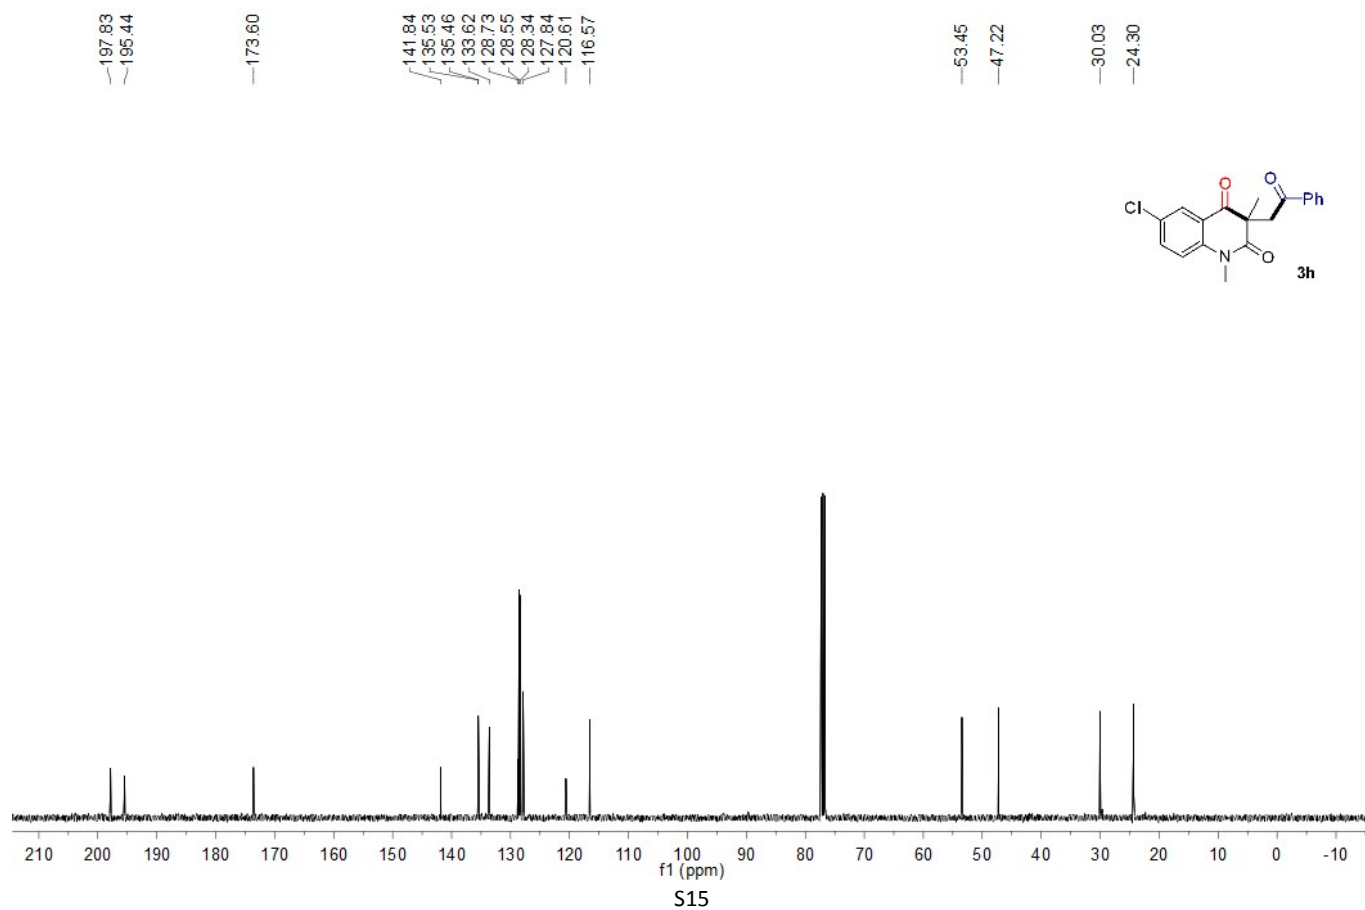

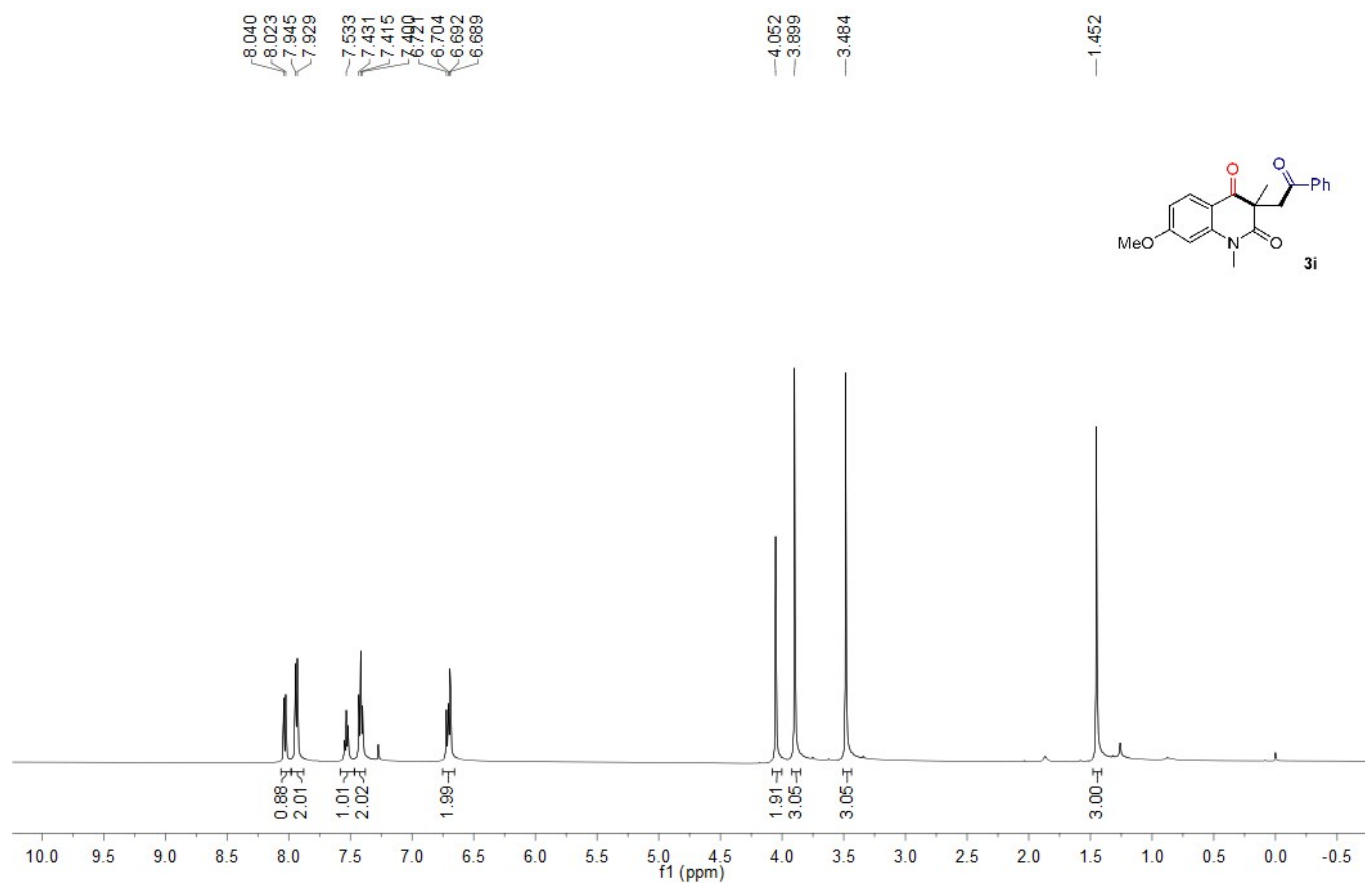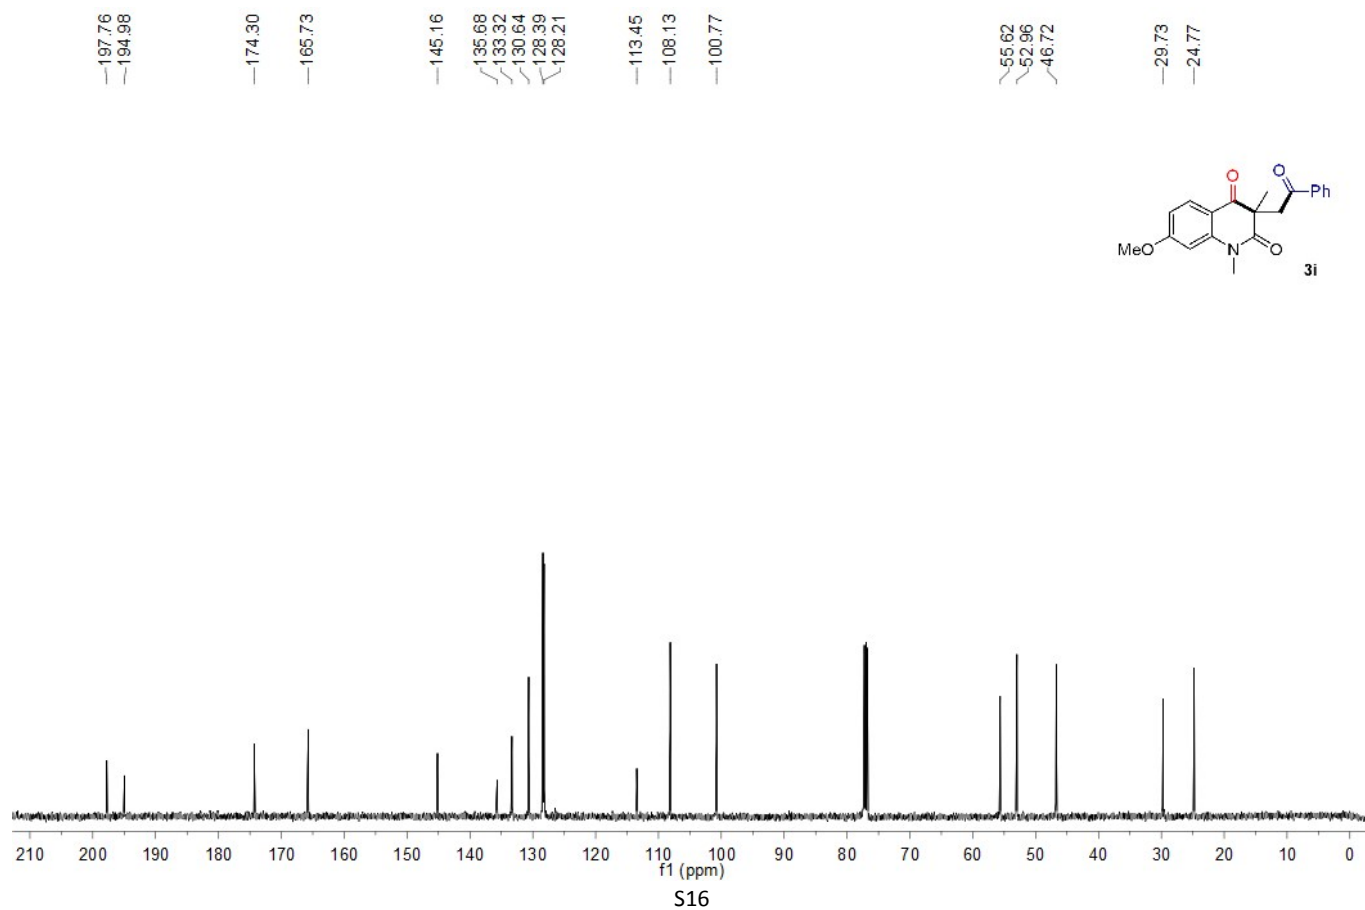



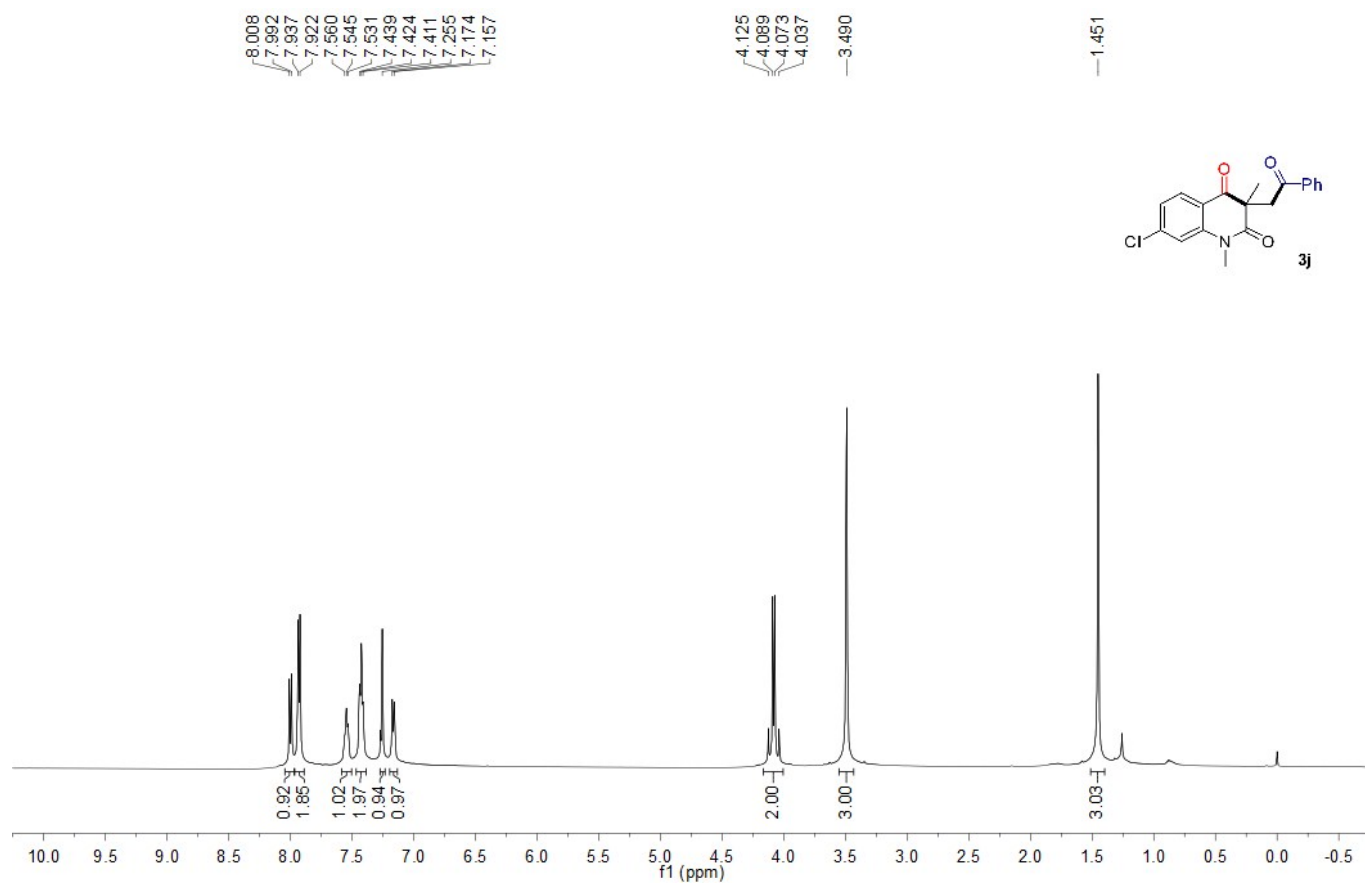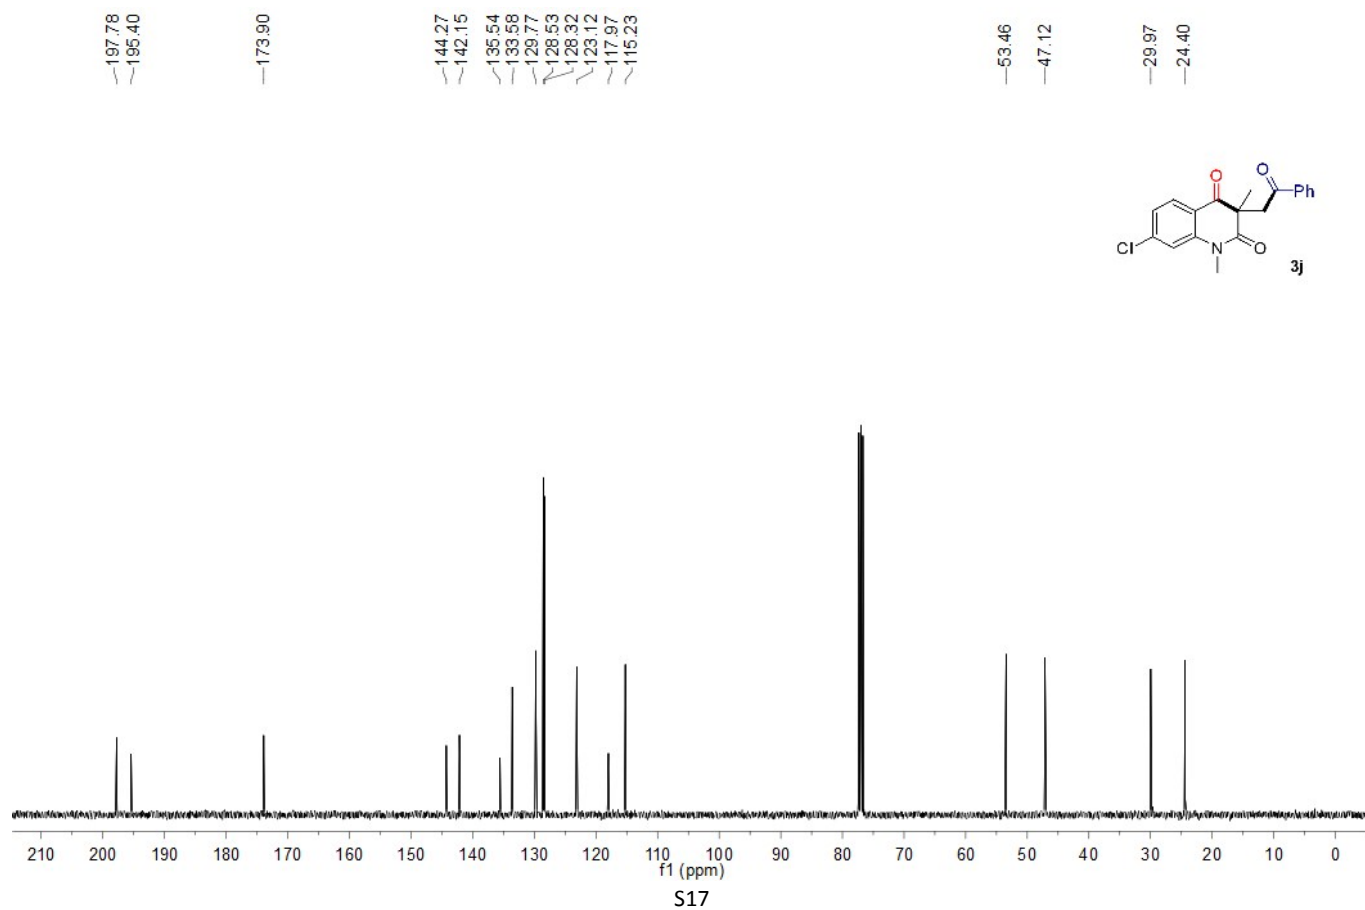

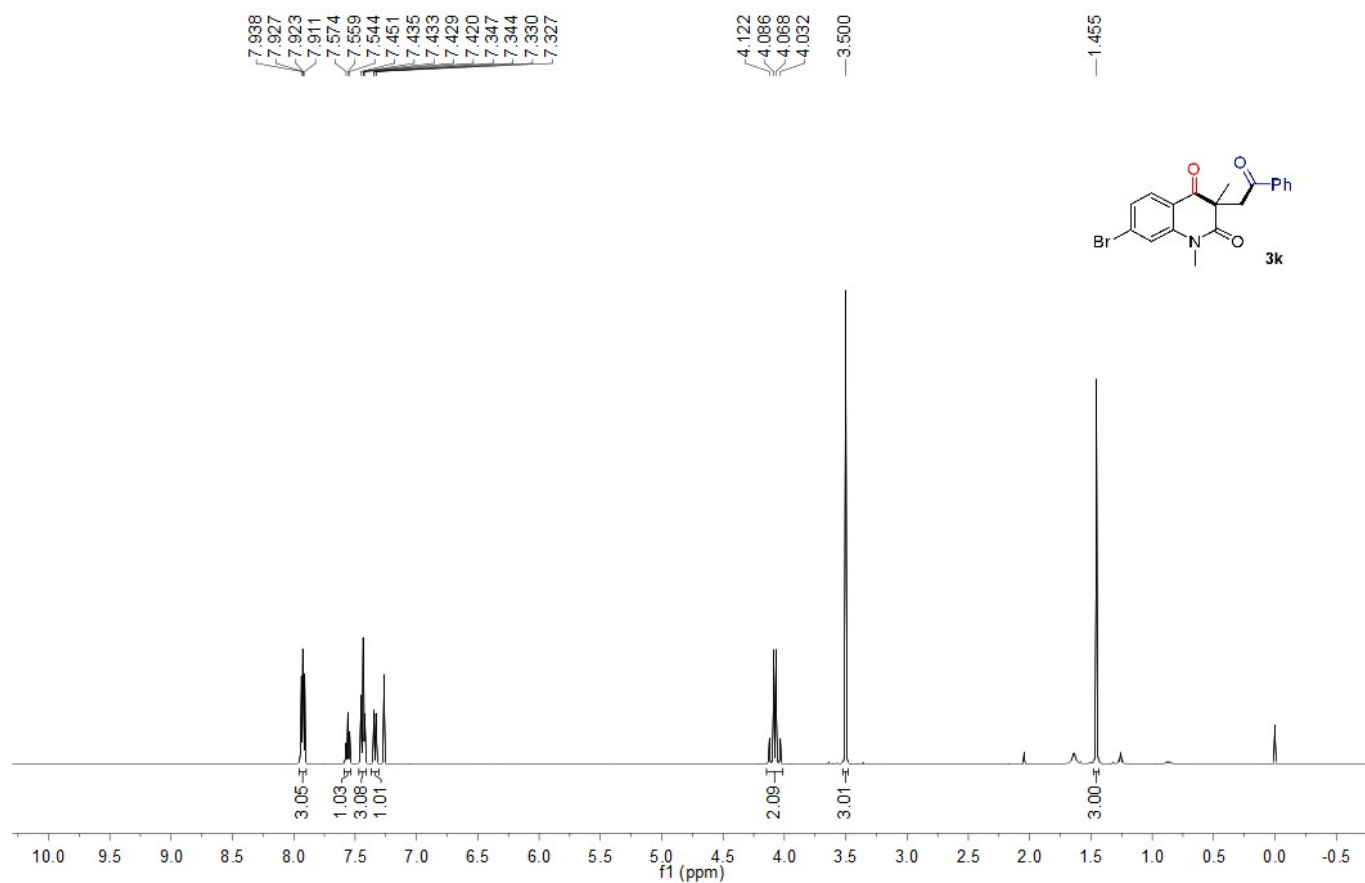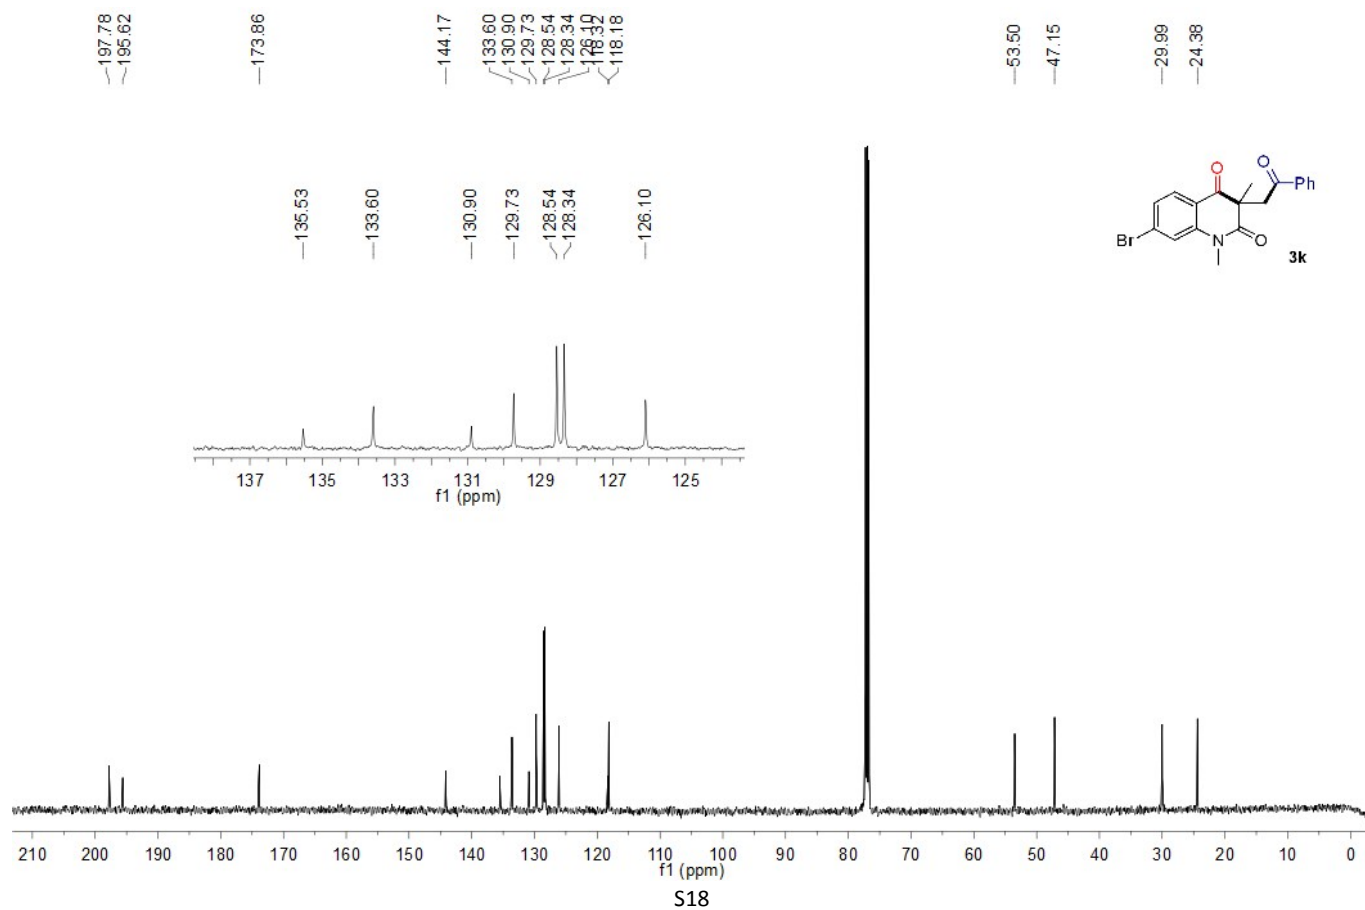

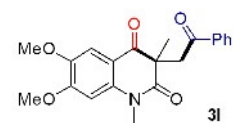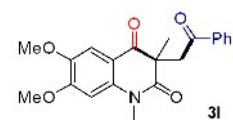

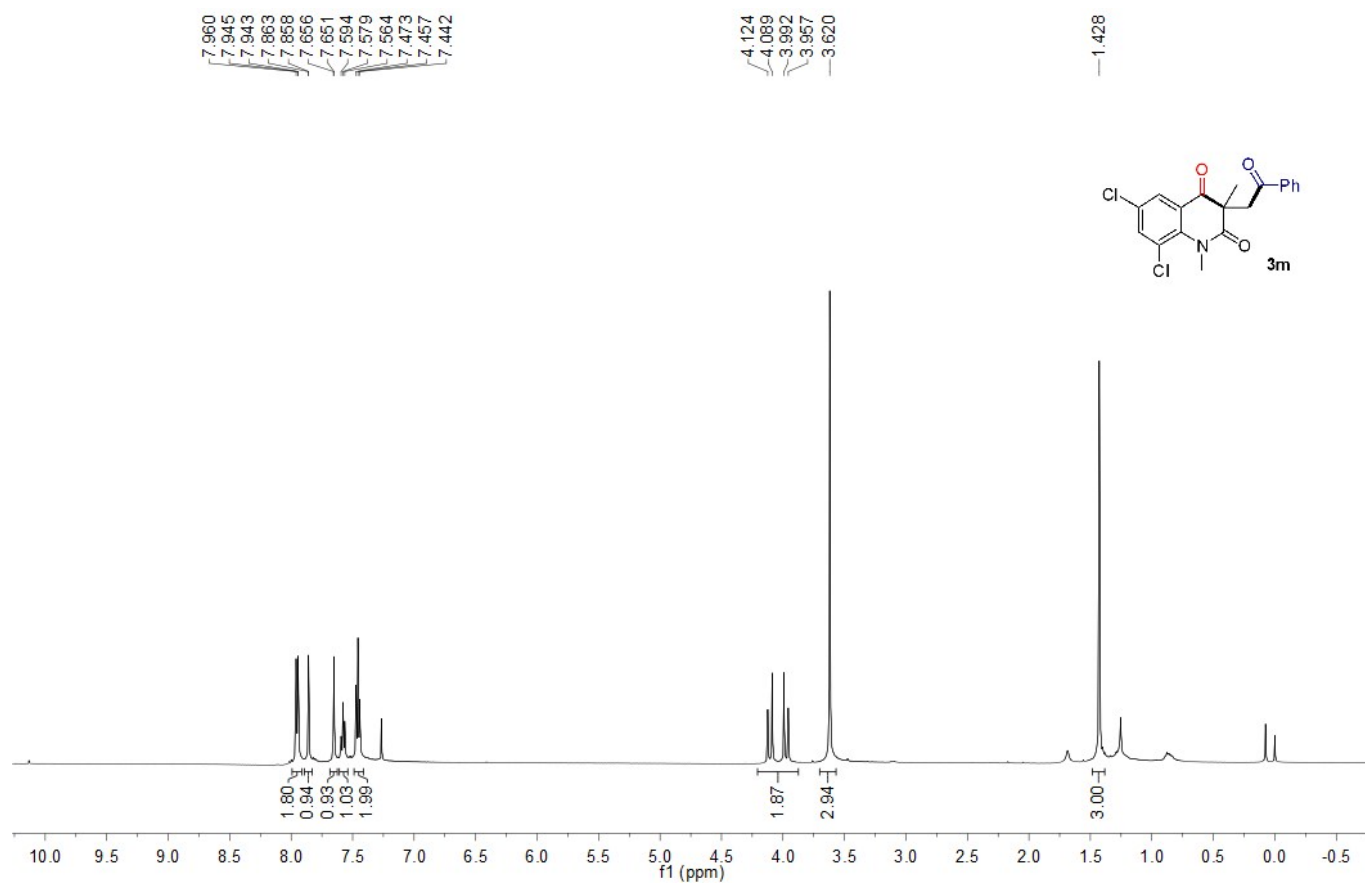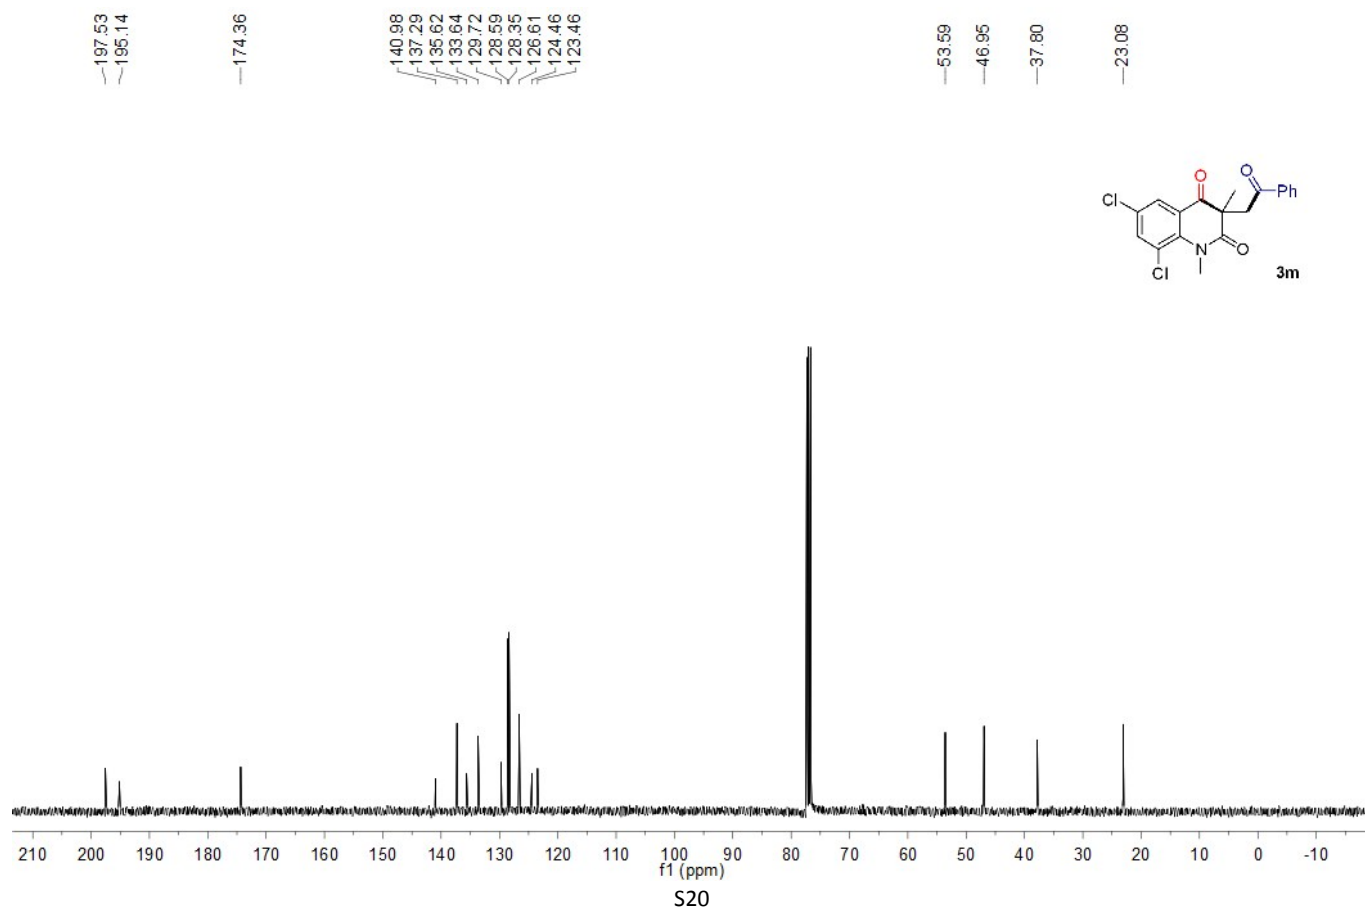

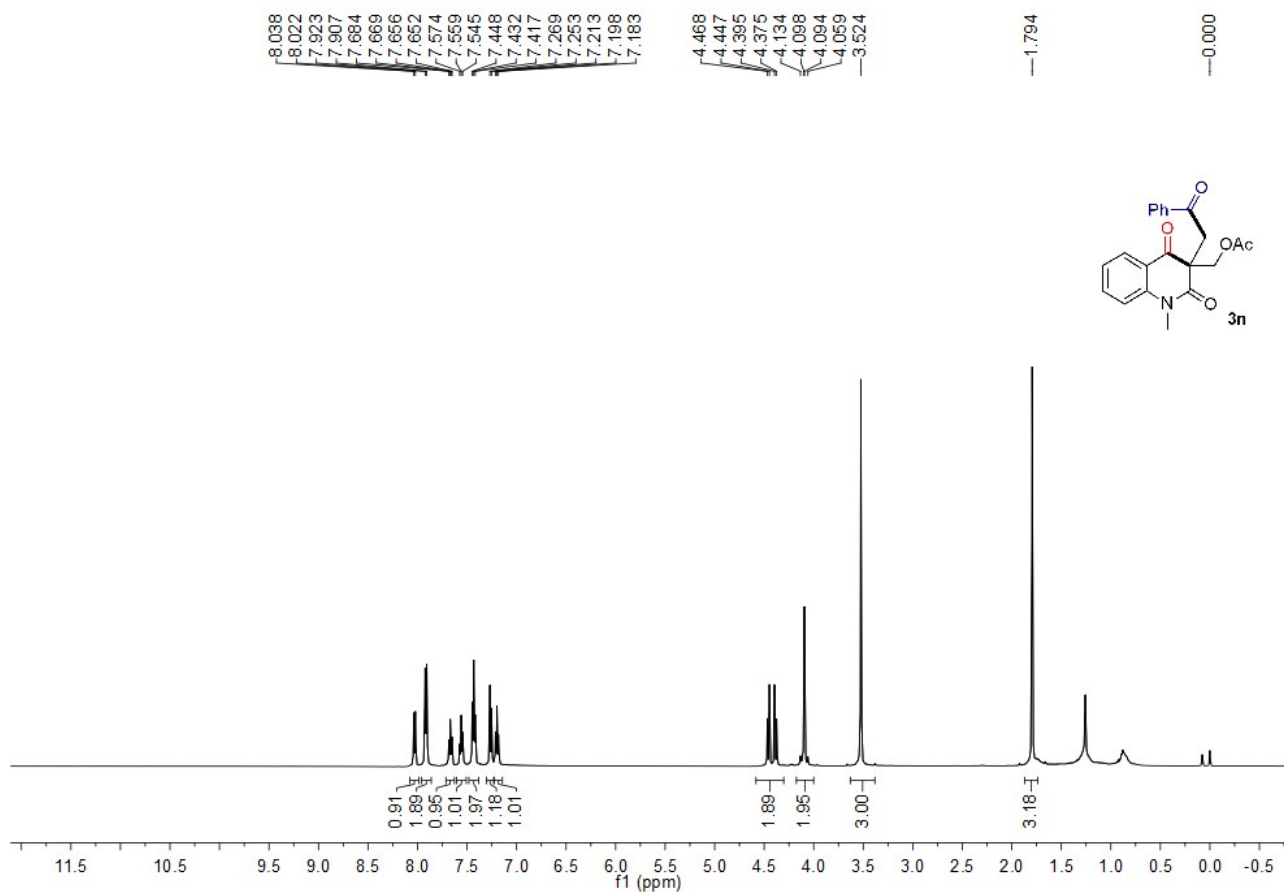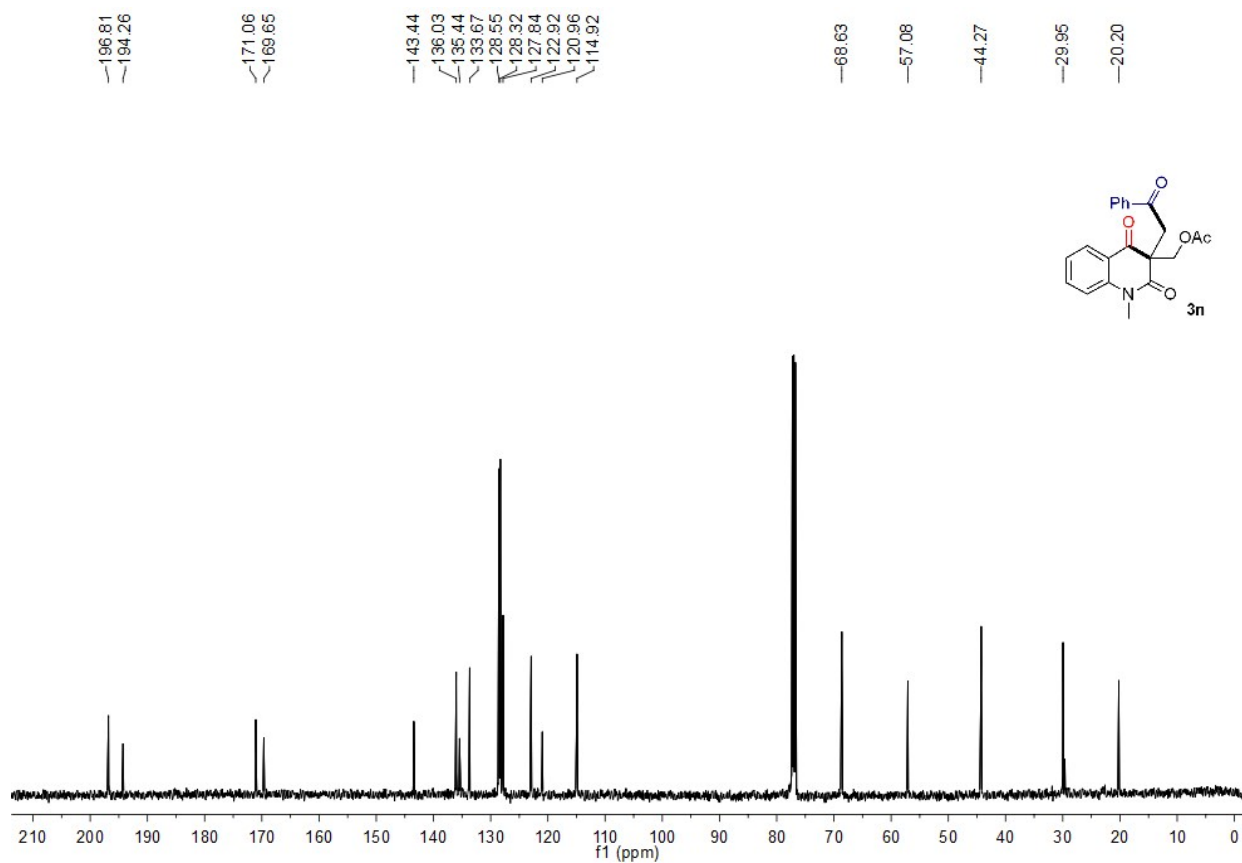

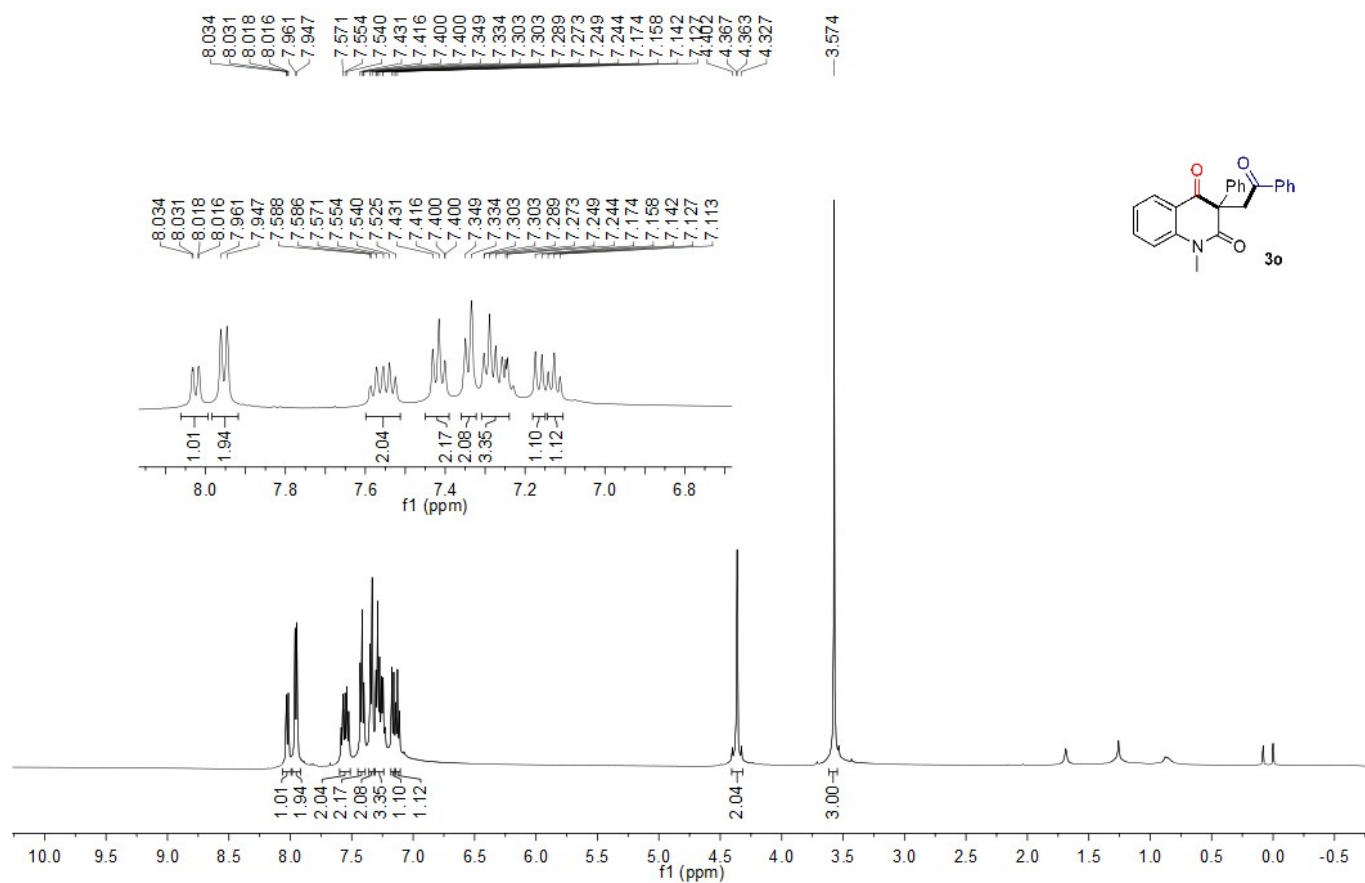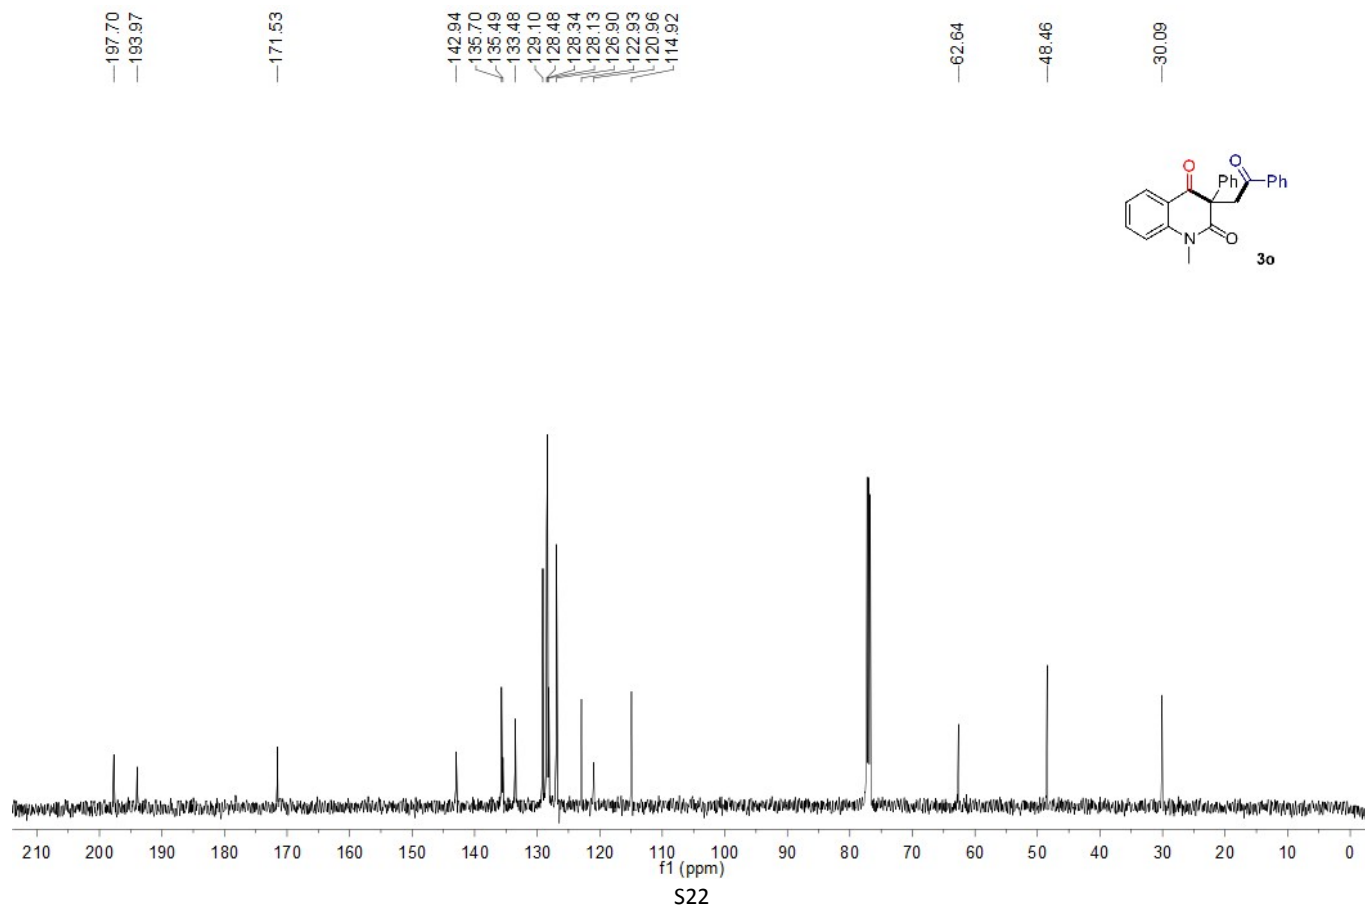

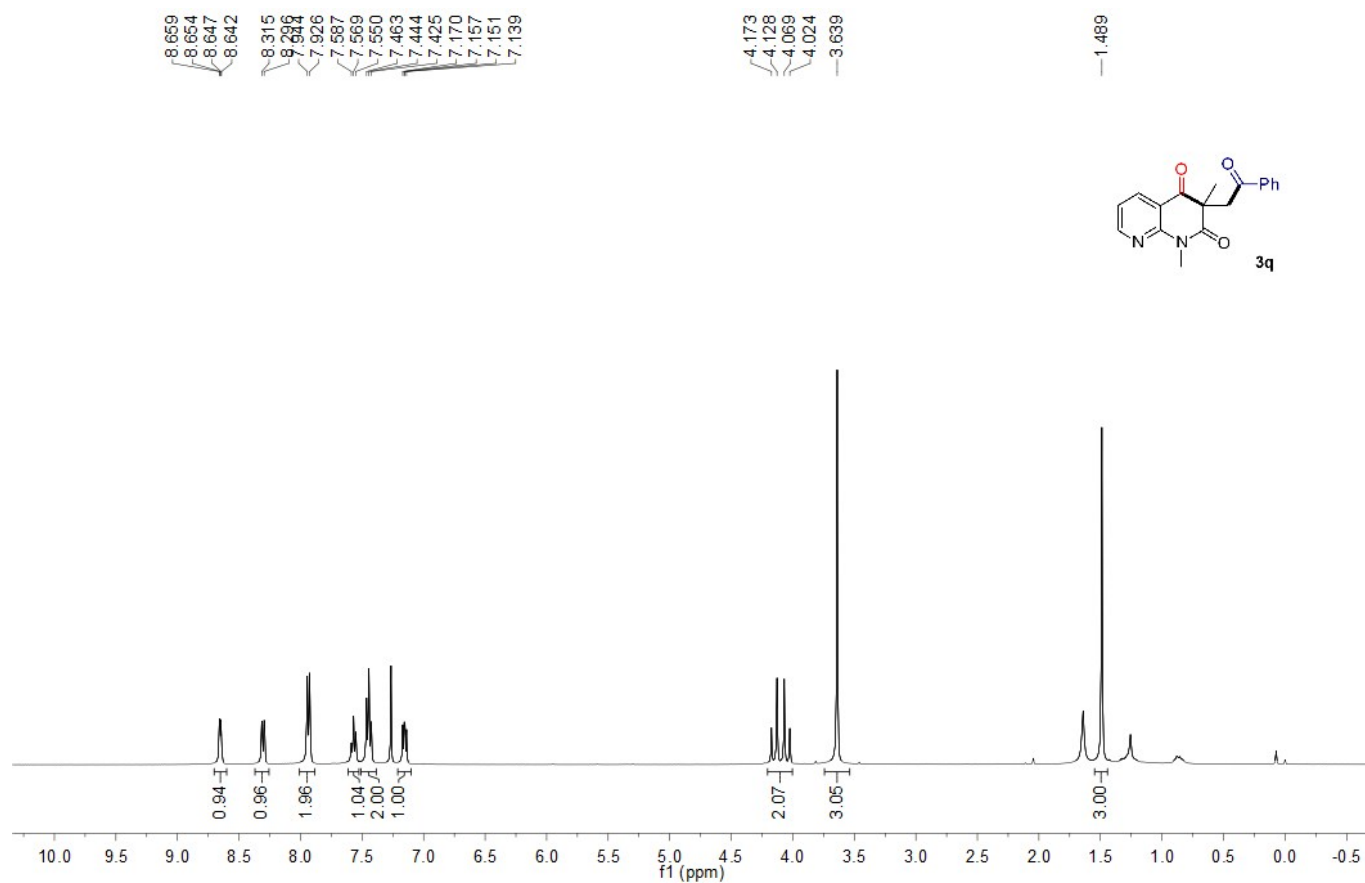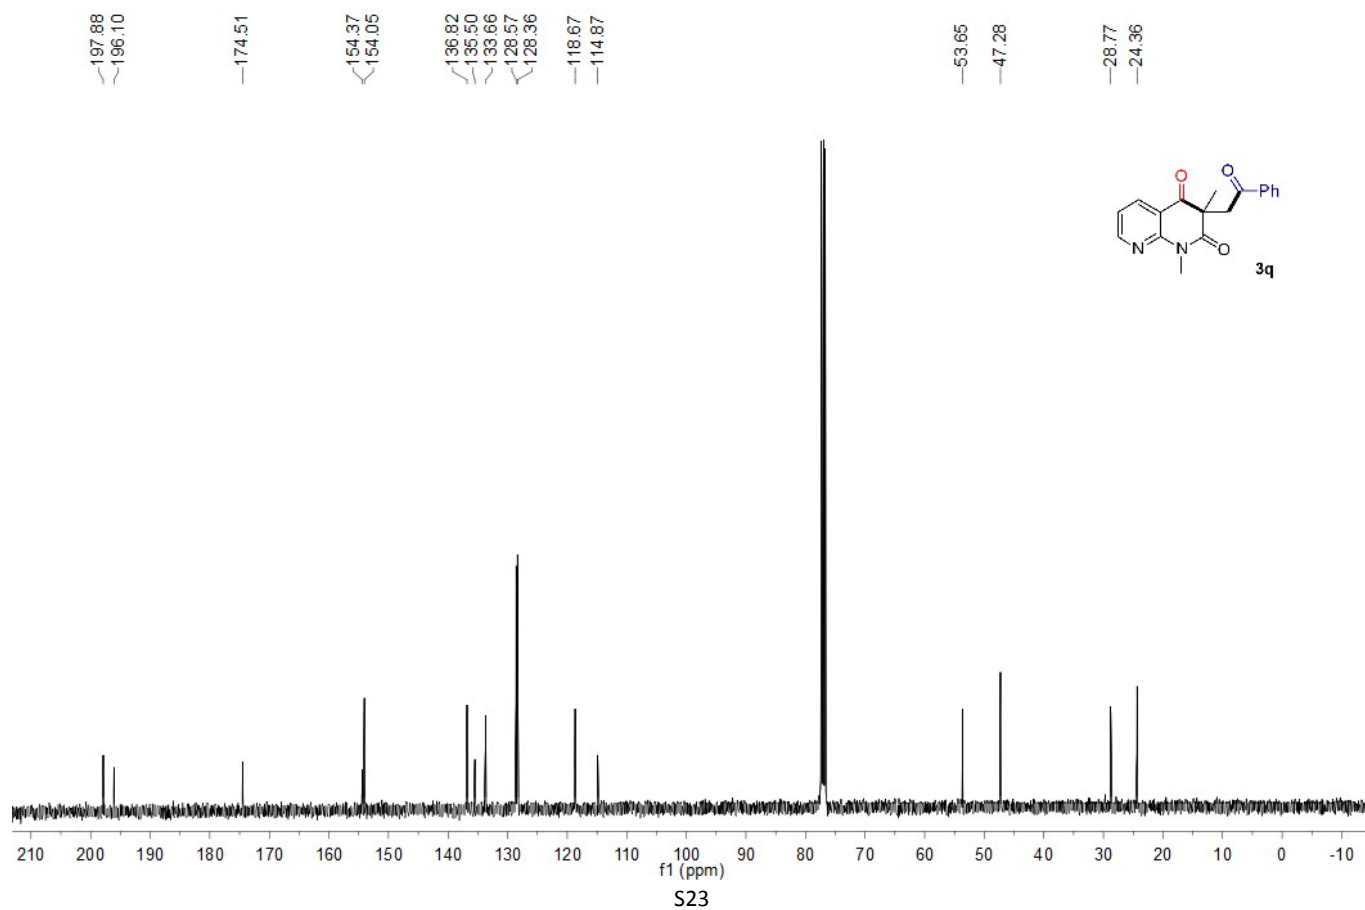

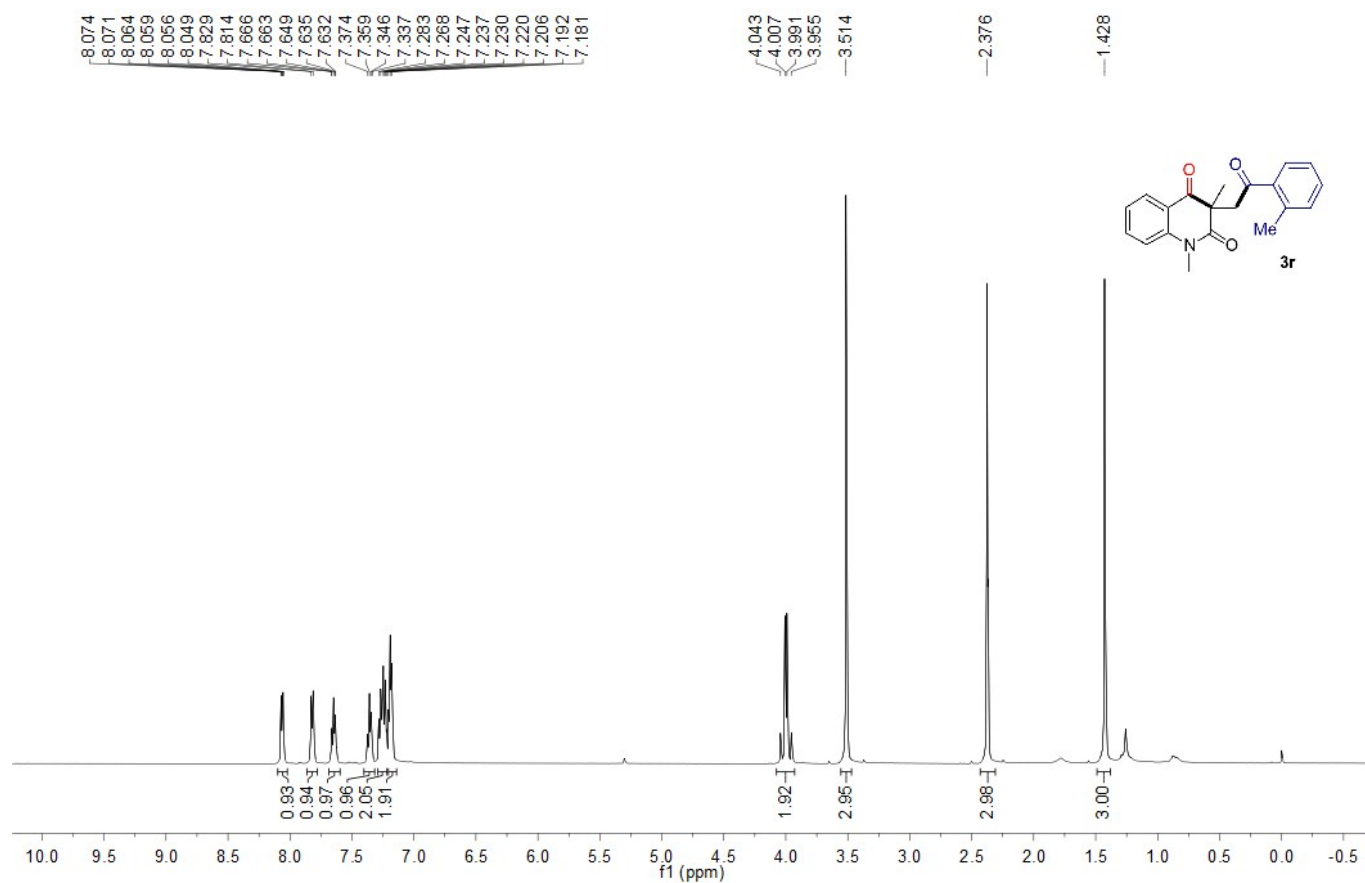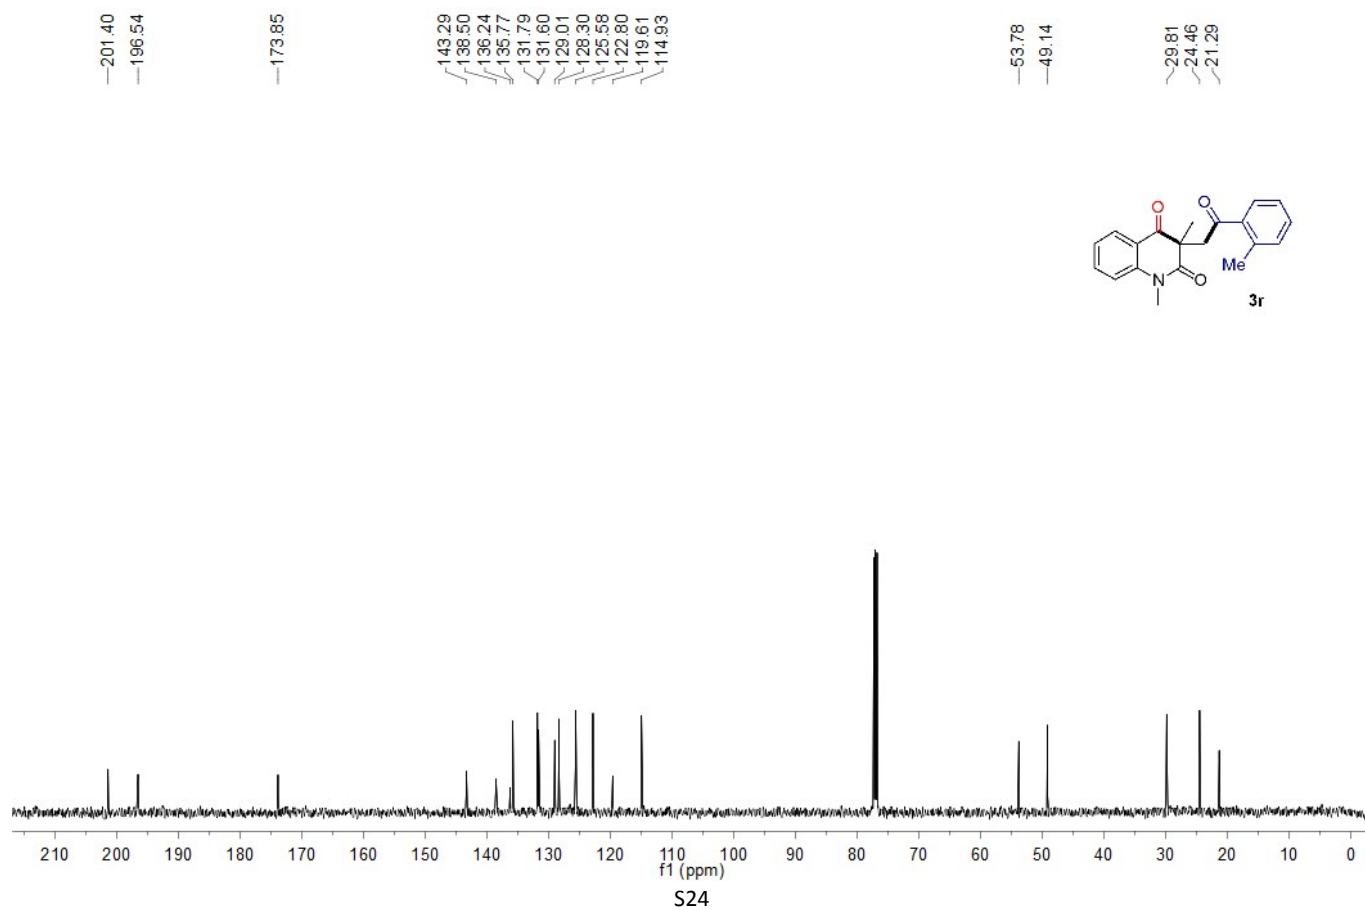



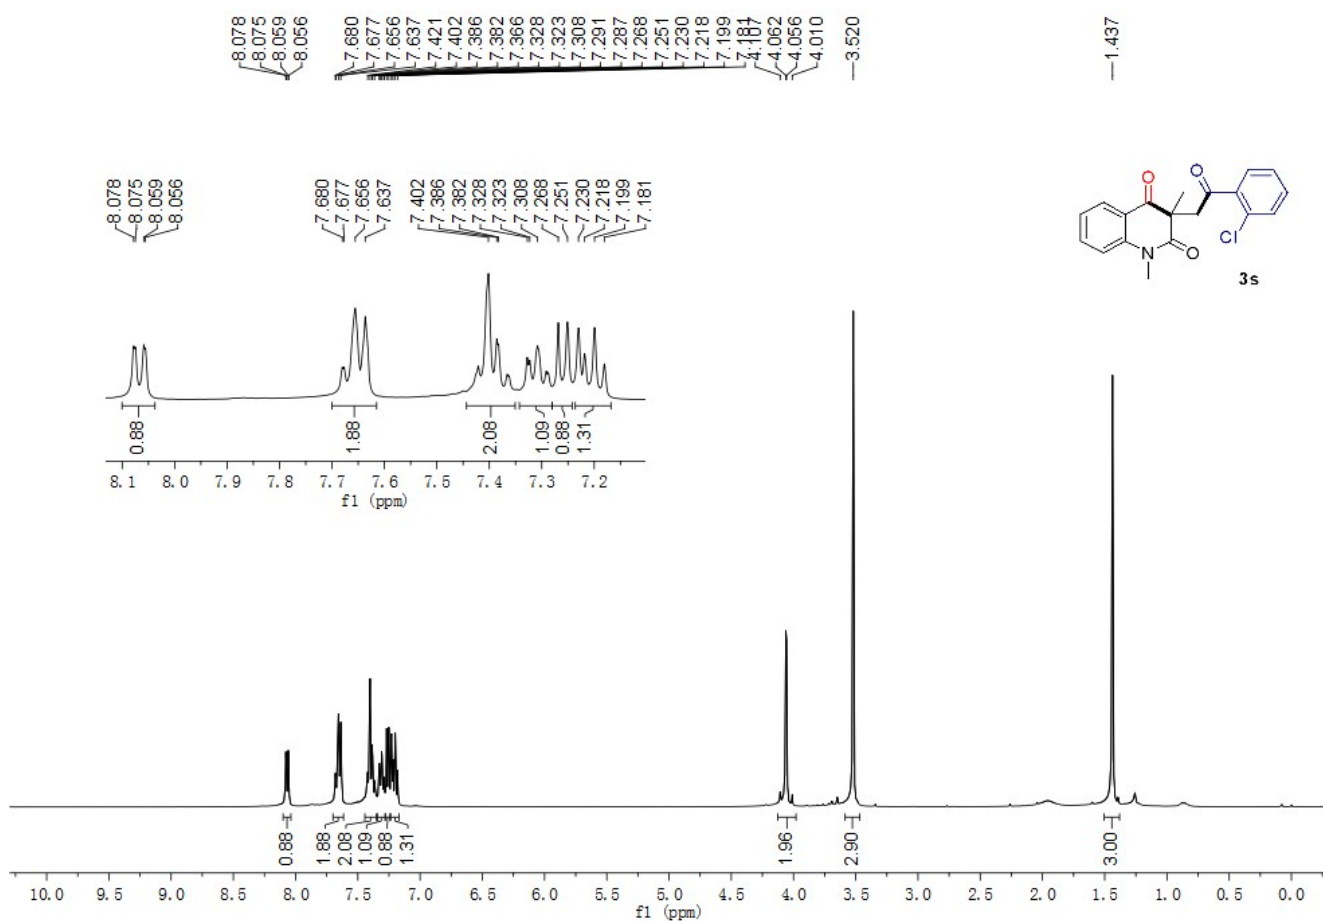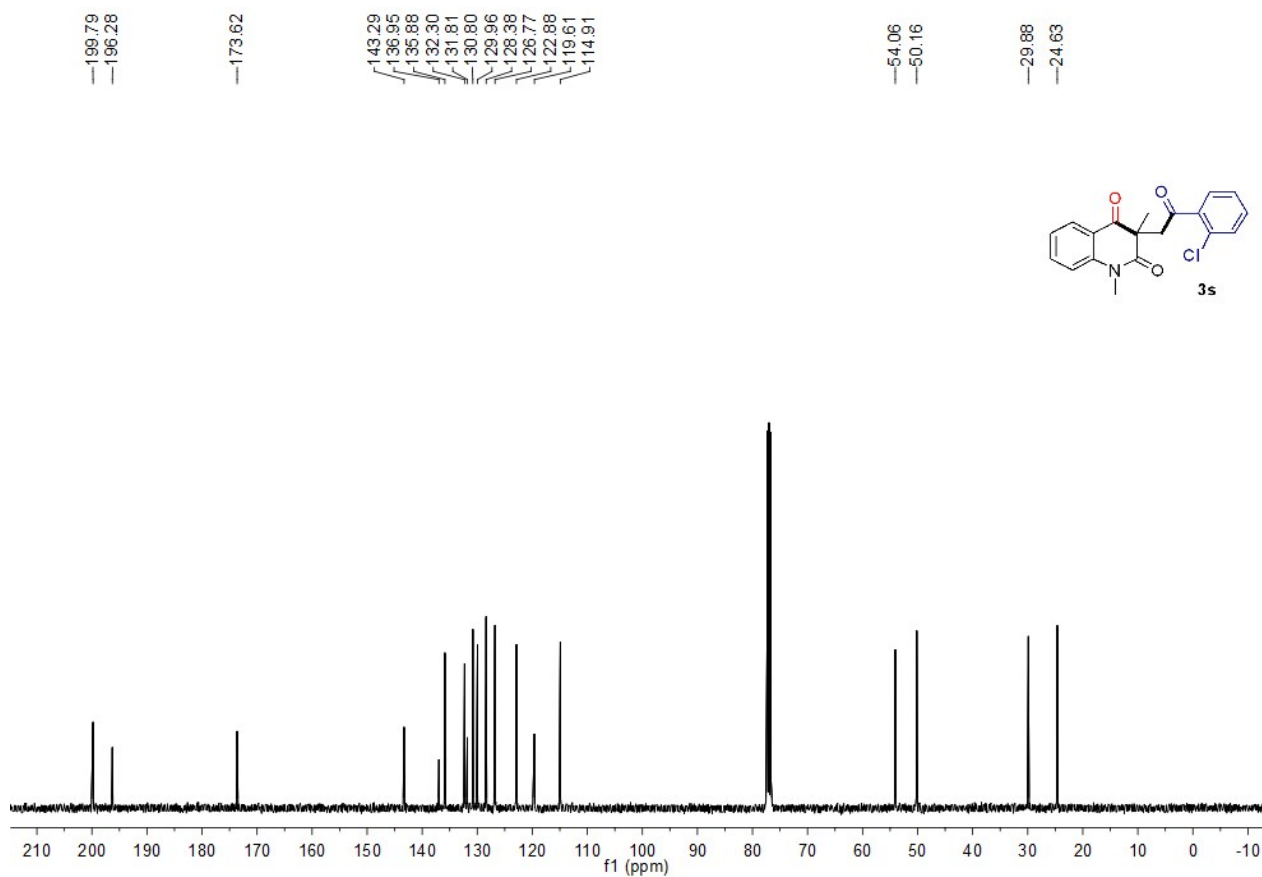

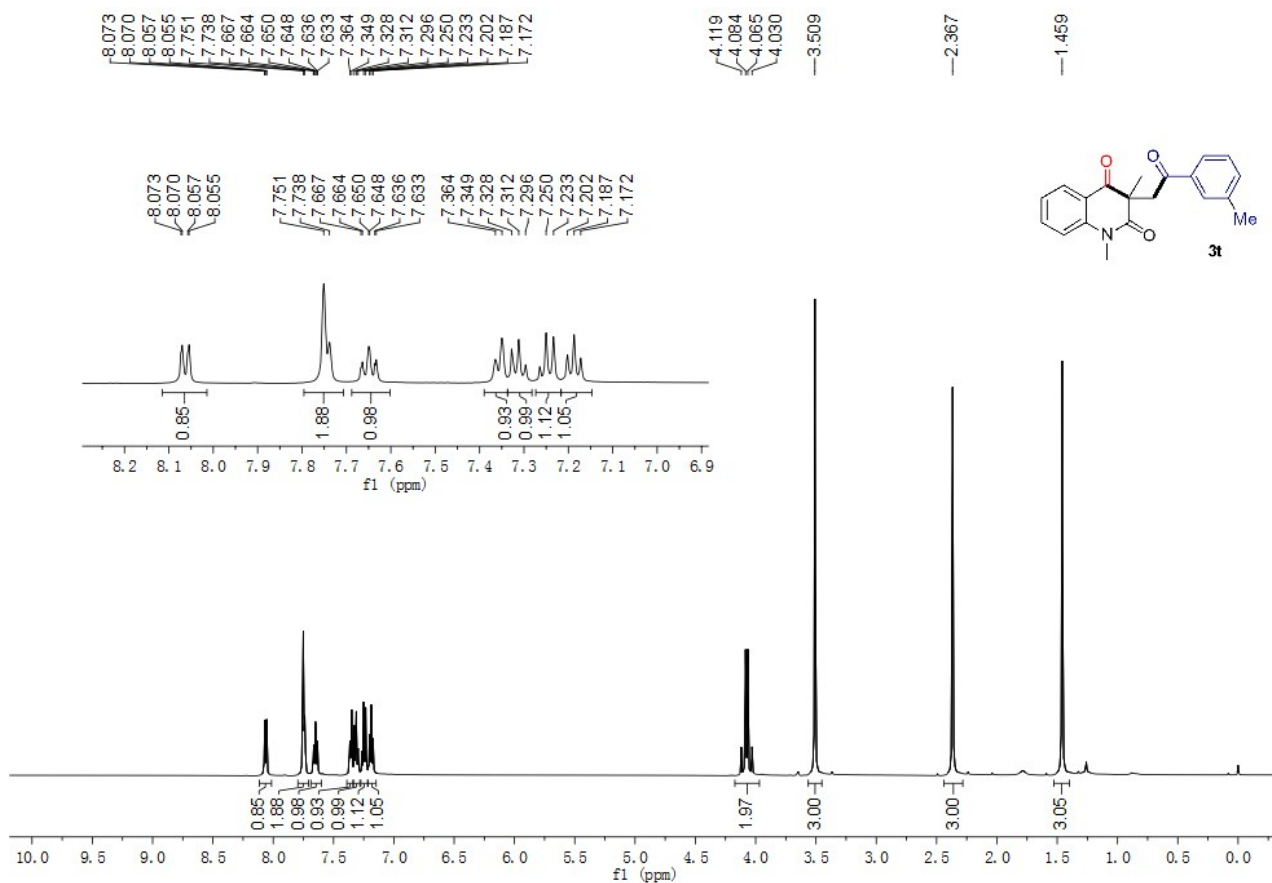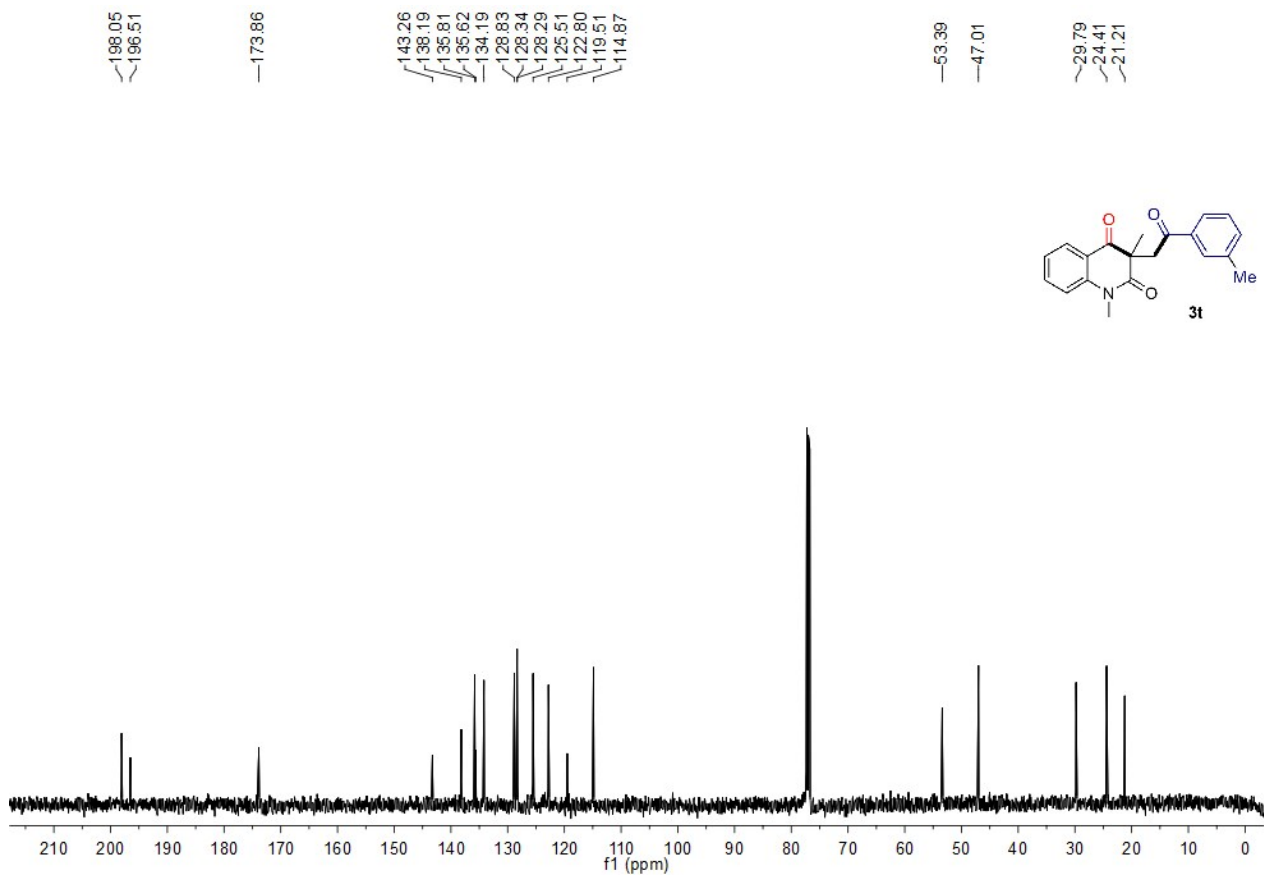

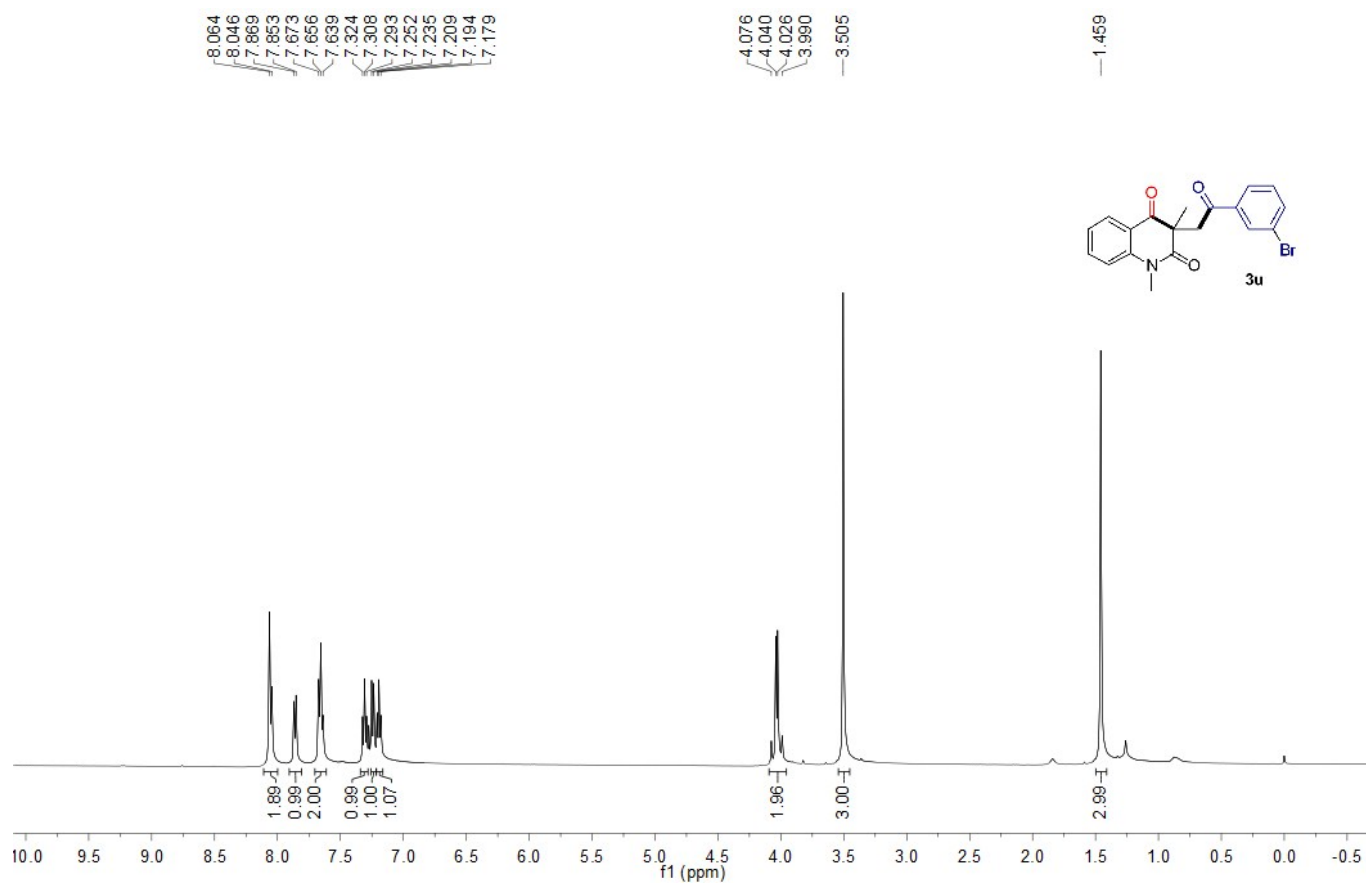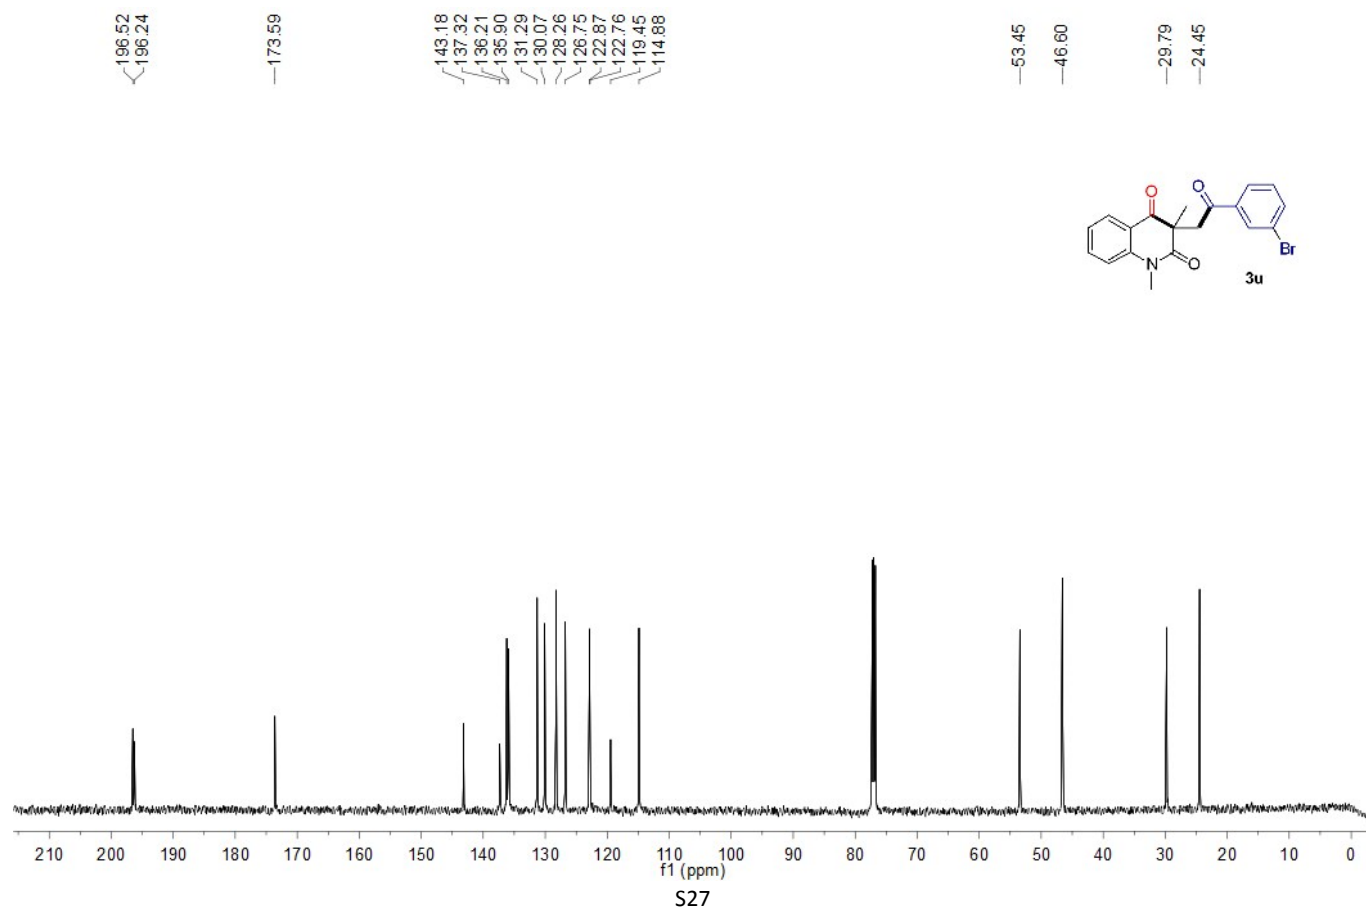

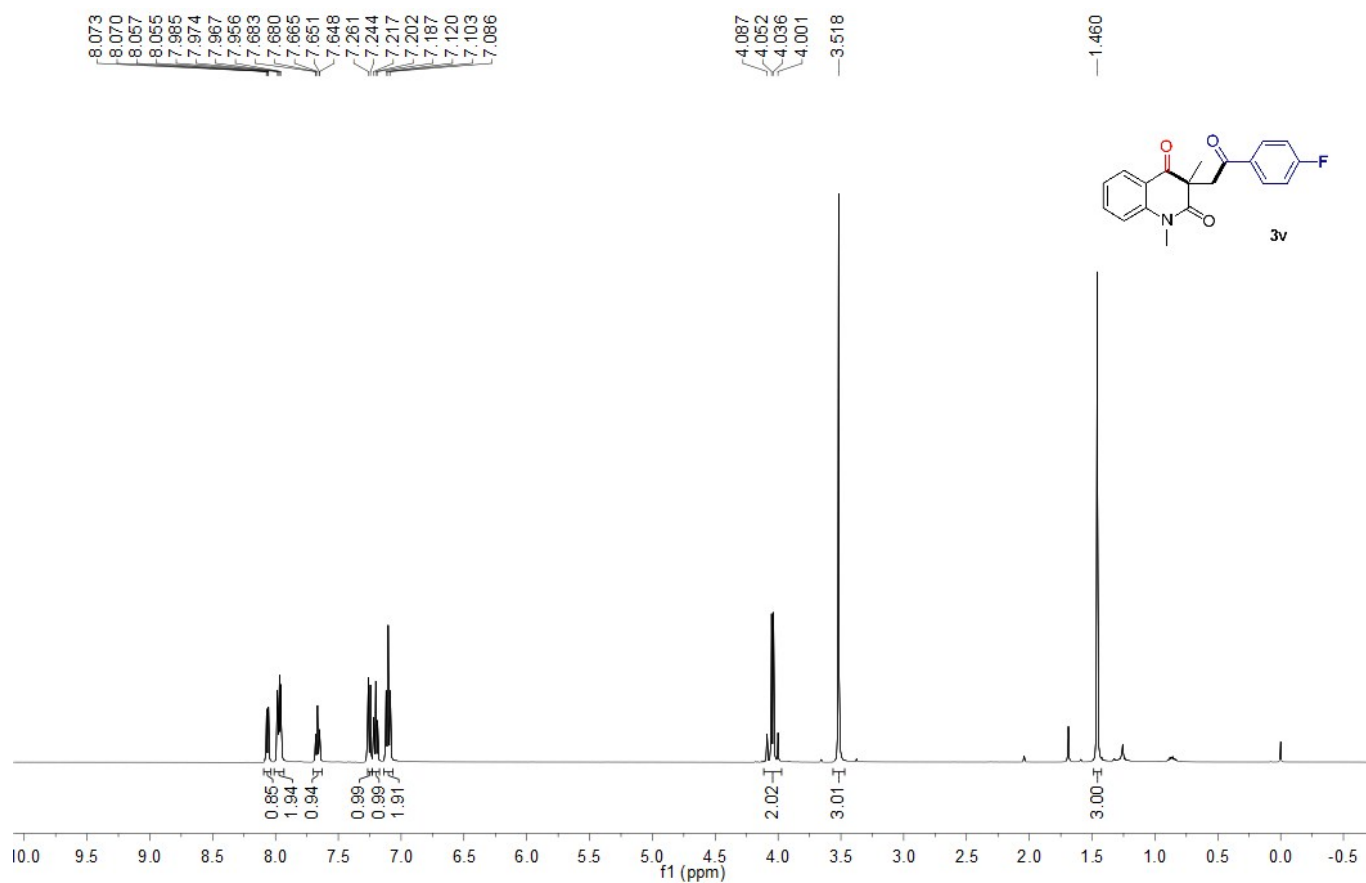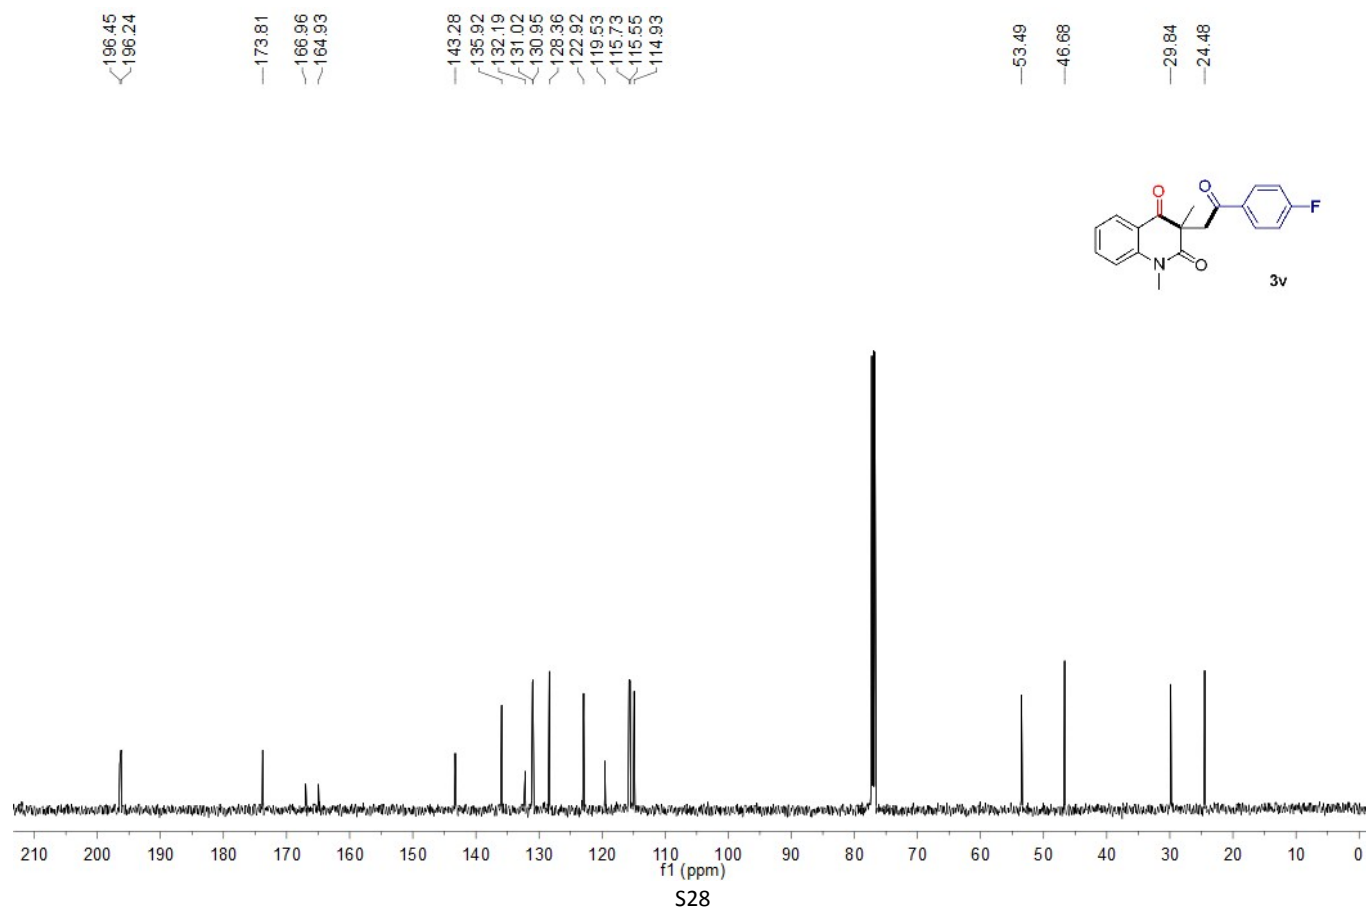

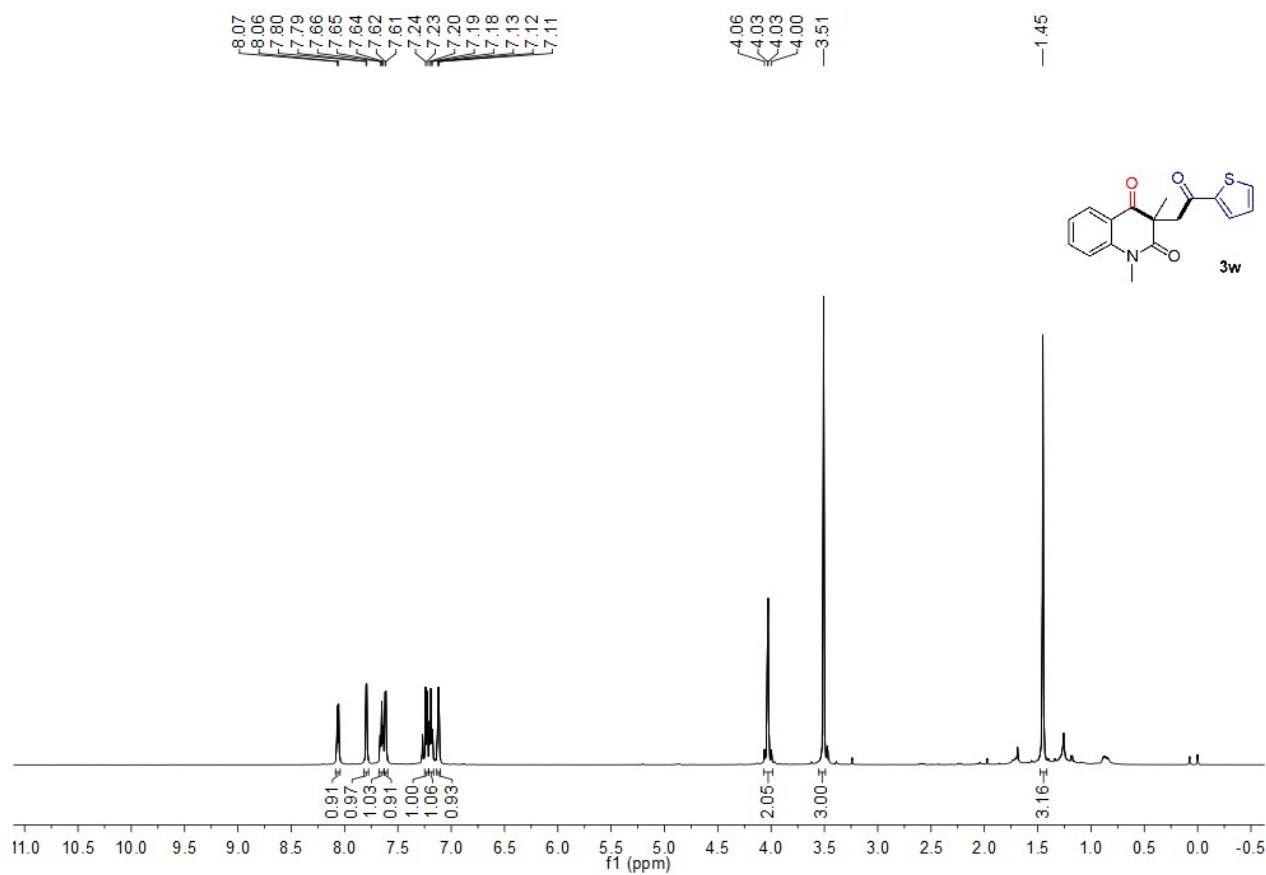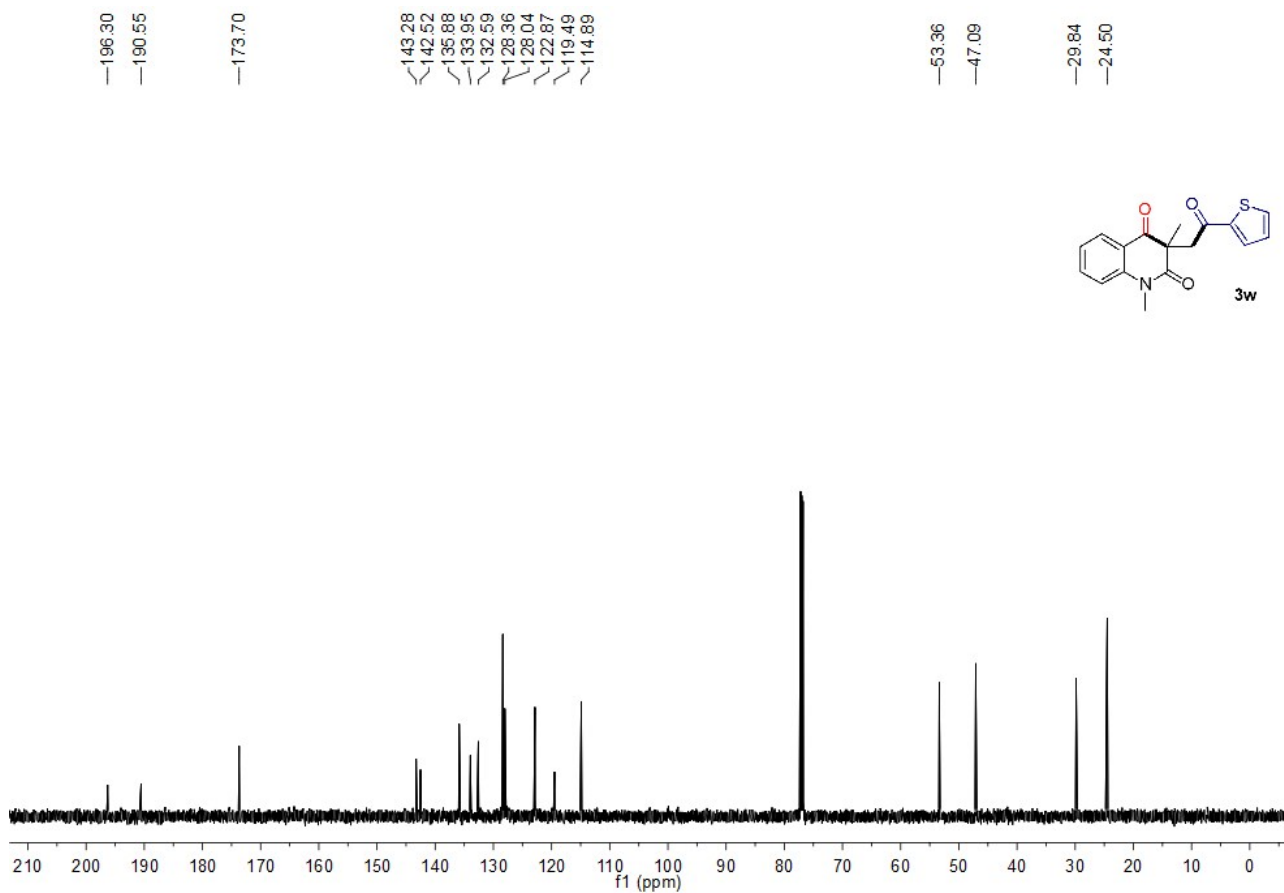

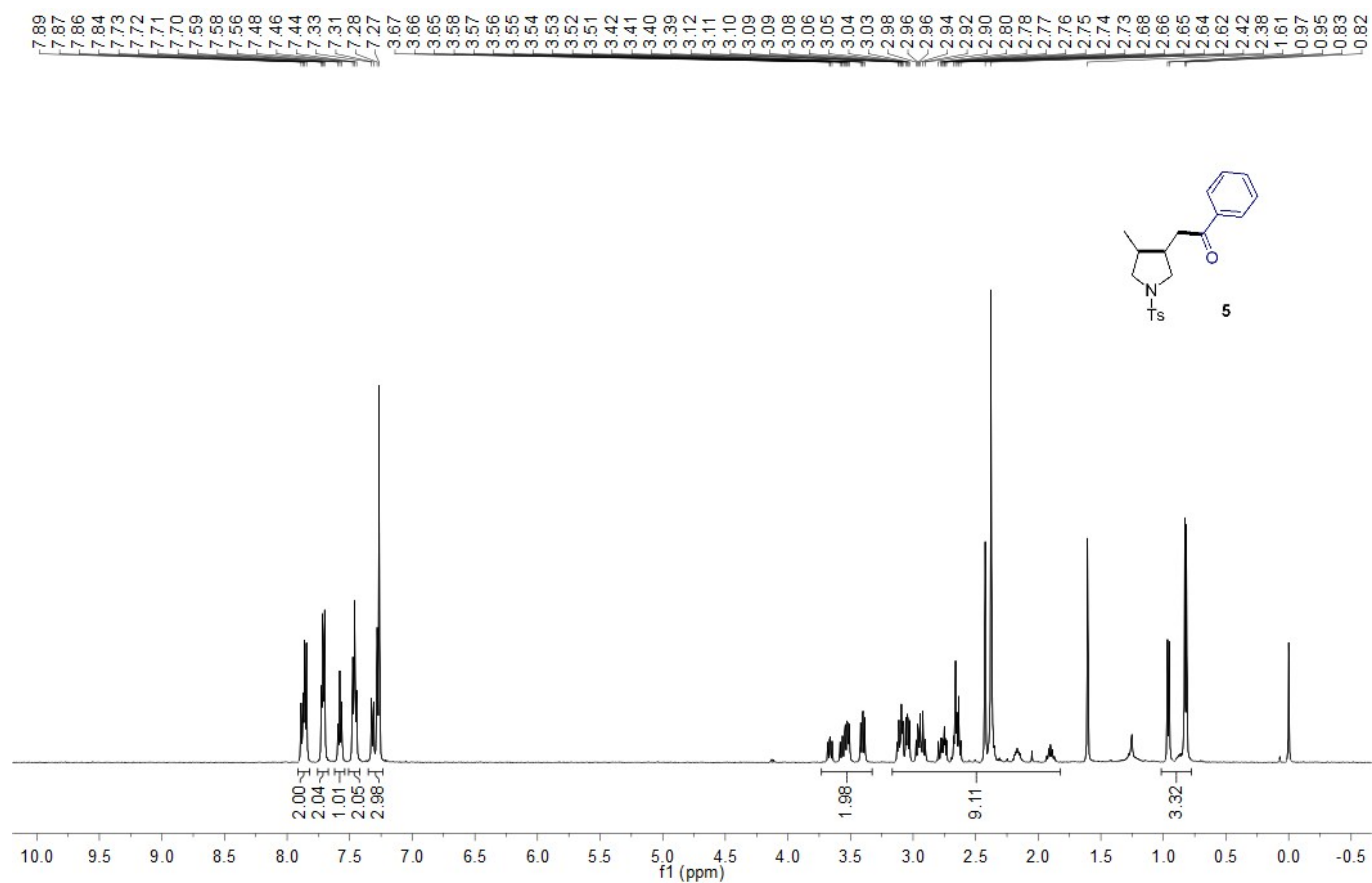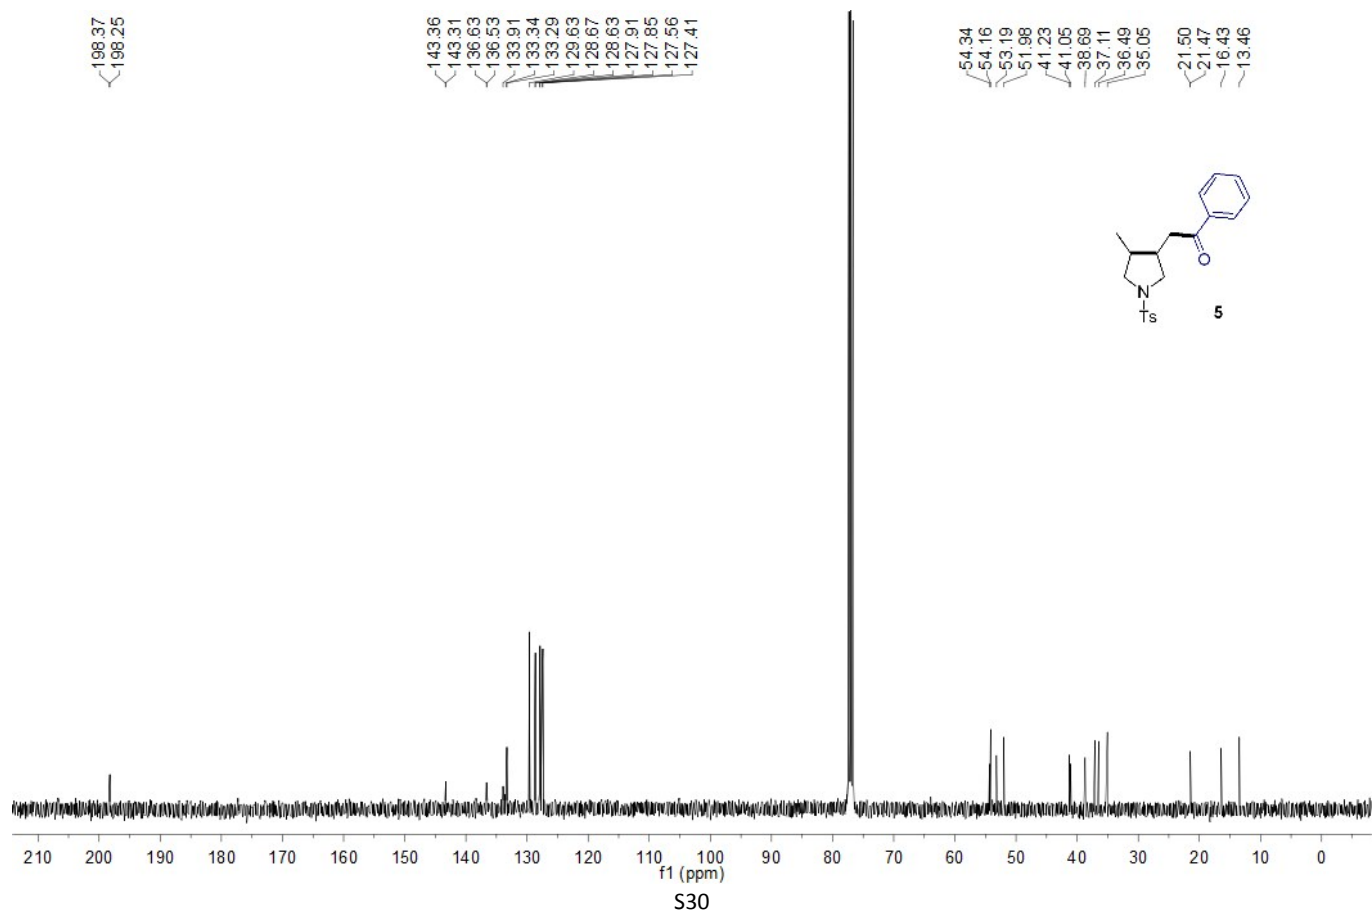

Supplement: c6ra08976c1.pdf [file c6ra08976c1.pdf]
